# Supplementary material for: Diagnosis of elevated intracranial pressure in critically ill adults: systematic review and meta-analysis
Source: PubMed Central journal article supplement — BMJ. 2019 Jul 24;366:l4225. doi: 10.1136/bmj.l4225 (PMC6651068; doi:10.1136/bmj.l4225), 2019-07-24
Supplement: fers049222.ww.pdf [file fers049222.ww.pdf]

Fernando SM, Tran A, Cheng W, Rochweg B, Taljaard M, Kyeremanteng K, English SW, Sekhon MS, Griesdale DEG, Dowlatshahi D, McCredie VA, Wijdicks EFM, Almenawer SA, Inaba K, Rajajee V, Perry JJ. Diagnosis of Elevated Intracranial Pressure in Critically Ill Adults – A Systematic Review and Meta-Analysis. *BMJ*.

## **ELECTRONIC APPENDIX**

|                                                                                                                                                     |    |
|-----------------------------------------------------------------------------------------------------------------------------------------------------|----|
| Supplemental Figure 1: Electronic Search Strategies .....                                                                                           | 3  |
| Supplemental Table 1: Standardized Data Extraction Sheet. ....                                                                                      | 5  |
| Supplemental Table 2: Detailed Characteristics of the 40 Included Studies. ....                                                                     | 7  |
| Supplemental Figure 2: QUADAS-2 Quality Assessment for Risk of Bias and Applicability of the 40 Included Studies. ....                              | 12 |
| Supplemental Table 3: Grading of Recommendations, Assessment, Development, and Evaluations (GRADE) Evidence Profile – Pupillary Dilation.....       | 14 |
| Supplemental Table 4: Grading of Recommendations, Assessment, Development, and Evaluations (GRADE) Evidence Profile – Motor Posturing .....         | 15 |
| Supplemental Table 5: Grading of Recommendations, Assessment, Development, and Evaluations (GRADE) Evidence Profile – GCS $\leq$ 8 .....            | 16 |
| Supplemental Table 6: Grading of Recommendations, Assessment, Development, and Evaluations (GRADE) Evidence Profile – Basal Cisterns .....          | 17 |
| Supplemental Table 7: Grading of Recommendations, Assessment, Development, and Evaluations (GRADE) Evidence Profile – Any Midline Shift .....       | 18 |
| Supplemental Table 8: Grading of Recommendations, Assessment, Development, and Evaluations (GRADE) Evidence Profile –Midline Shift $\geq$ 5mm.....  | 19 |
| Supplemental Table 9: Grading of Recommendations, Assessment, Development, and Evaluations (GRADE) Evidence Profile –Midline Shift $\geq$ 10mm..... | 20 |
| Supplemental Table 10: Grading of Recommendations, Assessment, Development, and Evaluations (GRADE) Evidence Profile –Marshall Score $\geq$ 3. .... | 20 |
| Supplemental Table 11: Grading of Recommendations, Assessment, Development, and Evaluations (GRADE) Evidence Profile –Marshall Score $\geq$ 4. .... | 21 |
| Supplemental Table 12: Grading of Recommendations, Assessment, Development, and Evaluations (GRADE) Evidence Profile –Marshall Score $\geq$ 5. .... | 22 |
| Supplemental Figure 3: HSROC Curve and Forest Plot for Pupillary Dilation. ....                                                                     | 24 |
| Supplemental Figure 4: HSROC Curve and Forest Plot for Motor Posturing.....                                                                         | 25 |
| Supplemental Figure 5: HSROC Curve and Forest Plot for Decreased Level of Consciousness (GCS $\leq$ 8). ....                                        | 26 |

|                                                                                                                  |    |
|------------------------------------------------------------------------------------------------------------------|----|
| Supplemental Figure 6: HSROC Curve and Forest Plot for Compression or Absence of Basal Cisterns.....             | 27 |
| Supplemental Figure 7: HSROC Curve and Forest Plot for Any Midline Shift.....                                    | 28 |
| Supplemental Figure 8: HSROC Curve and Forest Plot for Midline Shift $\geq$ 5mm. ....                            | 29 |
| Supplemental Figure 9: HSROC Curve and Forest Plot for Midline Shift $\geq$ 10mm. ....                           | 30 |
| Supplemental Figure 10: HSROC Curve and Forest Plot for Marshall Score $\geq$ 3. ....                            | 31 |
| Supplemental Figure 11: HSROC Curve and Forest Plot for Marshall Score $\geq$ 4. ....                            | 32 |
| Supplemental Figure 12: HSROC Curve and Forest Plot for Marshall Score $\geq$ 5. ....                            | 33 |
| Supplemental Figure 13: ROC Curves for Marshall Criteria By Study. ....                                          | 34 |
| Supplemental Table 13: Diagnostic Performance of Optic Nerve Sheath Diameter. ....                               | 35 |
| Supplemental Figure 14: Diagnostic Performance of Optic Nerve Sheath Diameter with Thresholds displayed. ....    | 36 |
| Supplemental Figure 15: TCD-ABP Methods for Detection of Elevated Intracranial Pressure. ....                    | 37 |
| Supplemental Table 14: Descriptive Table of TCD-ABP Methods for Detection of Elevated Intracranial Pressure..... | 38 |
| Supplemental Table 15: Sensitivity Analyses – Summary Estimates for Physical Examination and Imaging.....        | 39 |
| Supplemental Figure 16: Sensitivity Analysis for Pupillary Dilation .....                                        | 40 |
| Supplemental Figure 17: Sensitivity Analysis for Motor Posturing.....                                            | 41 |
| Supplemental Figure 18: Sensitivity Analysis for Decreased Level of Consciousness....                            | 42 |
| Supplemental Figure 19: Sensitivity Analysis for Compression or Absence of Basal Cisterns .....                  | 43 |
| Supplemental Figure 20: Sensitivity Analysis for Any Midline Shift.....                                          | 44 |
| Supplemental Figure 21: Sensitivity Analysis for Midline Shift $\geq$ 5mm .....                                  | 45 |
| Supplemental Figure 22: Sensitivity Analysis for Midline Shift $\geq$ 10mm .....                                 | 46 |
| Supplemental Table 16: Pre- and Post-test Probability of Elevated ICP – Physical Examination. ....               | 47 |
| Supplemental Table 17: Pre- and Post-test Probability of Elevated ICP – Computed Tomography.....                 | 48 |

**Supplemental Figure 1: Electronic Search Strategies.**

**Databases Searched:**

- EMBASE Classic + Embase
- PubMed/Medline
- Scopus
- Web of Science
- Cochrane Central Register of Controlled Trials (CENTRAL)

**EMBASE Classic + EMBASE 1947 to Week 39 2018**

Date of Search: September 30, 2018

|    | <b>Search Strategy</b>                                        | <b>Results</b> |
|----|---------------------------------------------------------------|----------------|
| 1  | intracranial pressure.mp.                                     | 32657          |
| 2  | intracranial pressure.tw.                                     | 21394          |
| 3  | intracranial pressure monitoring.mp.                          | 3028           |
| 4  | intracranial pressure monitoring.tw.                          | 1269           |
| 5  | intracranial pressure monitor.mp.                             | 167            |
| 6  | intracranial pressure monitor.tw.                             | 146            |
| 7  | intracranial hypertension.mp.                                 | 19244          |
| 8  | intracranial hypertension.tw.                                 | 9234           |
| 9  | 1 or 2 or 3 or 4 or 5 or 6 or 7 or 8                          | 43464          |
| 10 | diagnos*.tw.                                                  | 3077447        |
| 11 | prognos*.tw.                                                  | 770403         |
| 12 | predict*.tw.                                                  | 1775706        |
| 13 | model*.tw                                                     | 3060529        |
| 14 | utility.tw                                                    | 233183         |
| 15 | scor*.tw                                                      | 1237981        |
| 16 | validation.tw                                                 | 234880         |
| 17 | risk.tw                                                       | 2546031        |
| 18 | 10 or 11 or 12 or 13 or 14 or 15 or 16 or 17                  | 9456971        |
| 19 | <b>9 and 18</b>                                               | <b>17744</b>   |
| 20 | <b>limit 19 to (full text and human and English language)</b> | <b>2246</b>    |

**PubMed/MEDLINE 1946 to Week 39 2018**

Date of Search: September 30, 2018

|   | <b>Search Strategy</b>               | <b>Results</b> |
|---|--------------------------------------|----------------|
| 1 | intracranial pressure.mp.            | 23800          |
| 2 | intracranial pressure.tw.            | 16402          |
| 3 | intracranial pressure monitoring.mp. | 985            |
| 4 | intracranial pressure monitoring.tw. | 962            |
| 5 | intracranial pressure monitor.mp.    | 122            |
| 6 | intracranial pressure monitor.tw.    | 115            |
| 7 | intracranial hypertension.mp.        | 9379           |
| 8 | intracranial hypertension.tw.        | 6780           |

Diagnosis of Elevated Intracranial Pressure - Systematic Review – Supplement

|           |                                                               |              |
|-----------|---------------------------------------------------------------|--------------|
| <b>9</b>  | 1 or 2 or 3 or 4 or 5 or 6 or 7 or 8                          | 28664        |
| <b>10</b> | diagnos*.tw.                                                  | 2164757      |
| <b>11</b> | prognos*.tw.                                                  | 513335       |
| <b>12</b> | predict*.tw.                                                  | 1342456      |
| <b>13</b> | model*.tw                                                     | 2458128      |
| <b>14</b> | utility.tw                                                    | 170633       |
| <b>15</b> | scor*.tw                                                      | 804682       |
| <b>16</b> | validation.tw                                                 | 164864       |
| <b>17</b> | risk.tw                                                       | 1774111      |
| <b>18</b> | 10 or 11 or 12 or 13 or 14 or 15 or 16 or 17                  | 7129661      |
| <b>19</b> | <b>9 and 18</b>                                               | <b>10812</b> |
| <b>20</b> | <b>limit 19 to (full text and human and English language)</b> | <b>1533</b>  |

**Supplemental Table 1: Standardized Data Extraction Sheet.**

| <b>Data to be Extracted</b>                                                                                                                                | <b>Notes to Reviewer</b>                                                                  |
|------------------------------------------------------------------------------------------------------------------------------------------------------------|-------------------------------------------------------------------------------------------|
| <b>Basic Study Information</b>                                                                                                                             |                                                                                           |
| Study Title                                                                                                                                                |                                                                                           |
| Journal/Conference                                                                                                                                         |                                                                                           |
| Conference Abstract vs. Full-text                                                                                                                          |                                                                                           |
| Year of Publication                                                                                                                                        |                                                                                           |
| Language                                                                                                                                                   | If published in language other than English - Exclude                                     |
| Author                                                                                                                                                     | List first author only                                                                    |
| Correspondence Email                                                                                                                                       |                                                                                           |
| Study Design                                                                                                                                               |                                                                                           |
| Prospective vs. Retrospective                                                                                                                              |                                                                                           |
| Number of Sites                                                                                                                                            |                                                                                           |
| Country/Countries of Study                                                                                                                                 |                                                                                           |
| <b>Eligibility Assessment</b>                                                                                                                              |                                                                                           |
| Does the study include only adult patients (i.e. $\geq 16$ years of age)?                                                                                  | If “No” – Exclude                                                                         |
| Does the study include patients with primary brain injury?                                                                                                 | If “No” – Exclude                                                                         |
| Does the study include patients from <u>any</u> of the following: A) Emergency Department; B) Intensive Care Unit; C) Neurological Intermediate Care Unit? | If “No” – Exclude                                                                         |
| Does the study provide original data on accuracy of diagnostic measures for elevated ICP?                                                                  | If “No” – Exclude                                                                         |
| Was diagnosis of ICP confirmed using intracranial monitor with ICP $\geq 20$ mmHg or intraoperative confirmation?                                          | If “No” – Exclude                                                                         |
| Does the study only include cases of confirmed elevated ICP? (i.e. without controls)                                                                       | If “Yes” – Exclude                                                                        |
| Is the data presented in the study completely included in another report?                                                                                  | If “Yes” – Exclude                                                                        |
| Are the true positive, false positive, true negative and false negative counts stated, or can they be derived?                                             | If “No” – Contact Corresponding Author, if no response after three attempts, then exclude |
| <b>Index Test</b>                                                                                                                                          |                                                                                           |
| In what setting were diagnostic parameters calculated?                                                                                                     | e.g. Emergency Department, ICU                                                            |
| <b>Outcome</b>                                                                                                                                             |                                                                                           |
| How was elevated ICP confirmed?                                                                                                                            | e.g. ICP monitor $\geq 20$ mmHg                                                           |
| <b>Study Population</b>                                                                                                                                    |                                                                                           |

Diagnosis of Elevated Intracranial Pressure - Systematic Review – Supplement

|                                                                                         |                                                             |
|-----------------------------------------------------------------------------------------|-------------------------------------------------------------|
| From which setting were patients recruited?                                             | e.g. Emergency Department, Hospital Wards, ICU              |
| Was population was included?                                                            |                                                             |
| Were elderly patients included?                                                         |                                                             |
| Were patients with a ‘Do Not Resuscitate’ (or similar) order included?                  |                                                             |
| Were pregnant patients included?                                                        |                                                             |
| Were patients with any other co-morbidity included/excluded?                            |                                                             |
| Was the study population limited by symptom duration? If yes, indicate symptom duration |                                                             |
| If computed tomography was tested, what type of CT was used?                            |                                                             |
| <b>2x2 Tables Diagnostic Parameter 1</b>                                                |                                                             |
| Diagnostic test being evaluated                                                         | e.g. Pupillary Dilation, motor posturing                    |
| Total number of patients                                                                |                                                             |
| Total number of ICP+ patients                                                           |                                                             |
| Total number of ICP- patients                                                           |                                                             |
| Total number of Test+ patients                                                          |                                                             |
| Total number of Test- patients                                                          |                                                             |
| True positives                                                                          |                                                             |
| False positives                                                                         |                                                             |
| True negatives                                                                          |                                                             |
| False negatives                                                                         |                                                             |
| Specificity provided                                                                    |                                                             |
| Sensitivity provided                                                                    |                                                             |
| <b>2x2 Tables Diagnostic Parameter 2</b>                                                |                                                             |
| Total number of patients                                                                | e.g. Pupillary Dilation, motor posturing                    |
| Total number of ICP+ patients                                                           |                                                             |
| Total number of ICP- patients                                                           |                                                             |
| Total number of Test+ patients                                                          |                                                             |
| Total number of Test- patients                                                          |                                                             |
| True positives                                                                          |                                                             |
| False positives                                                                         |                                                             |
| True negatives                                                                          |                                                             |
| False negatives                                                                         |                                                             |
| Specificity provided                                                                    |                                                             |
| Sensitivity provided                                                                    |                                                             |
| <b>Author Contact</b>                                                                   |                                                             |
| Contact author?                                                                         | If more information needed, indicate here to contact author |

**Supplemental Table 2:** Detailed Characteristics of the 40 Included Studies. Abbreviations: CT = computed tomography; ICH = Intracerebral hemorrhage; ICP = Intracranial pressure; SAH = Subarachnoid hemorrhage; TBI = Traumatic brain injury; TCD = Transcranial doppler

| Author (Year)    | Year | Journal                   | Type of Study    | Sites | Country        | Sample Size | Population    | Inclusion Criteria                                                             | Exclusion Criteria                                          | ICP Gold Standard                 | ICP+                  | ICP- | % Elevated ICP |
|------------------|------|---------------------------|------------------|-------|----------------|-------------|---------------|--------------------------------------------------------------------------------|-------------------------------------------------------------|-----------------------------------|-----------------------|------|----------------|
| Badri (2012)     | 2012 | <i>Intensive Care Med</i> | Randomized trial | 1     | USA            | 365         | TBI           | Moderate-severe TBI (GCS < or = 12), Age >14, Cr < 177                         | Pregnant, prisoners, residents abroad, died within 48 hours | Intraparenchymal pressure monitor | 59                    | 306  | 16.16          |
| Cardim (2012)    | 2012 | <i>Neurocrit Care</i>     | Retrospective    | 1     | United Kingdom | 27          | TBI           | At least one plateau wazve during ICP recording                                | None listed                                                 | Intraparenchymal pressure monitor | ONLY FOR TCD ANALYSIS |      |                |
| Colquhoun (1989) | 1989 | <i>Clin Radiol</i>        | Prospective      | 1     | United Kingdom | 17          | TBI           | TBI patients admitted to neurosurgical ward                                    | None listed                                                 | Intraventricular pressure monitor | 14                    | 3    | 82.35          |
| Donovan (1998)   | 1998 | <i>Lancet</i>             | Retrospective    | 1     | USA            | 12          | Liver Disease | Patients admitted with liver cirrhosis and evidence of increased ICP           | None listed                                                 | Epidural pressure monitor         | 7                     | 5    | 58.33          |
| Frumin (2014)    | 2014 | <i>West J Emerg Med</i>   | Prospective      | 1     | USA            | 27          | Mixed         | Adult patients admitted to Neurosurgical Service with placement of ICP monitor | None listed                                                 | Intraparenchymal pressure monitor | 6                     | 21   | 22.22          |
| Galbraith (1981) | 1981 | <i>J Neurosurg</i>        | Prospective      | 1     | Scotland       | 26          | TBI           | Severe TBI with intracranial hematoma, with ICP monitoring                     | Patients with injury deemed to be unsurvivable              | intraventricular pressure monitor | 16                    | 10   | 61.54          |
| Geeraerts (2007) | 2007 | <i>Intensive Care Med</i> | Prospective      | 1     | France         | 31          | TBI           | TBI patients admitted to neurosurgical ward                                    | None listed                                                 | Intraparenchymal pressure monitor | 15                    | 16   | 48.39          |
| Hamani (2003)    | 2003 | <i>Arq Neuropsiquiatr</i> | Prospective      | 1     | Brazil         | 10          | ICH           | Patients with ganglionic and thalamic                                          | None listed                                                 | intraventricular pressure monitor | 3                     | 7    | 30             |

## Diagnosis of Elevated Intracranial Pressure - Systematic Review – Supplement

|                    |      |                             |               |   |             |     |                 |                                                                                |                                                                       |                                     |     |     |       |
|--------------------|------|-----------------------------|---------------|---|-------------|-----|-----------------|--------------------------------------------------------------------------------|-----------------------------------------------------------------------|-------------------------------------|-----|-----|-------|
|                    |      |                             |               |   |             |     |                 | hemorrhage;<br>GCS 13 or less                                                  |                                                                       |                                     |     |     |       |
| Hara (1998)        | 1998 | <i>Neurol Res</i>           | Retrospective | 1 | Japan       | 55  | Mixed           | Adult patients admitted to Neurosurgical Service with placement of ICP monitor | None listed                                                           | Intraventricular pressure monitor   | 33  | 22  | 60    |
| Hayashi (1982)     | 1982 | <i>J Neurosurg</i>          | Prospective   | 1 | Japan       | 17  | Mixed           | ICP monitoring and plateau waves detected                                      | None listed                                                           | intraventricular pressure monitor   | 12  | 5   | 70.59 |
| Heuer (2004)       | 2004 | <i>J Neurosurg</i>          | Retrospective | 1 | USA         | 433 | SAH             | Aneurysmal SAH with placement of ICP monitor                                   | None listed                                                           | Intraventricular pressure monitor   | 234 | 199 | 54.04 |
| Hukkelhoven (2005) | 2005 | <i>Intensive Care Med</i>   | Prospective   | 1 | Netherlands | 134 | TBI             | TBI patients admitted to neurosurgical ward                                    | None listed                                                           | Intraparenchymal pressure monitor   | 86  | 48  | 64.18 |
| Jeon (2017)        | 2017 | <i>PLoS One</i>             | Prospective   | 2 | South Korea | 62  | Mixed           | Adult patients admitted to Neurosurgical Service with placement of ICP monitor | Ocular trauma; Severe mass effect; Decompression before ICP placement | Intraventricular pressure monitor   | 32  | 30  | 51.61 |
| Jeon (2018)        | 2018 | <i>J Intensive Care Med</i> | Retrospective | 1 | South Korea | 25  | Ischemic Stroke | Decompressive craniectomy for ischemic stroke                                  | None listed                                                           | Intraparenchymal pressure monitor   | 5   | 20  | 20    |
| Kamel (2012)       | 2012 | <i>Neurocrit Care</i>       | Retrospective | 1 | USA         | 57  | ICH             | Acute ICH with placement of ICP monitor                                        | Transferred from a different centre; acute ICH without ICP monitor    | Intraparenchymal pressure monitor   | 40  | 17  | 70.18 |
| Kimberly (2007)    | 2007 | <i>Acad Emerg Med</i>       | Prospective   | 1 | USA         | 38  | Mixed           | Adult patients admitted to Neurosurgical Service with placement of ICP monitor | None listed                                                           | Intraventricular pressure monitor   | 8   | 30  | 21.05 |
| Kramer (2016)      | 2016 | <i>Neurocrit Care</i>       | Prospective   | 1 | Canada      | 644 | TBI             | Consecutive adult patients with moderate to severe TBI                         | None listed                                                           | Emergency Decompressive Craniectomy | 51  | 593 | 7.92  |



Diagnosis of Elevated Intracranial Pressure - Systematic Review – Supplement

|                 |      |                                 |               |    |             |     |       |                                                                                                   |                                                      |                                     |     |     |       |
|-----------------|------|---------------------------------|---------------|----|-------------|-----|-------|---------------------------------------------------------------------------------------------------|------------------------------------------------------|-------------------------------------|-----|-----|-------|
|                 |      |                                 |               |    |             |     |       | (GCS < or = 12), admitted to ICU                                                                  |                                                      |                                     |     |     |       |
| Lee (2018)      | 2018 | <i>Clin Neurol Neurosurg</i>    | Retrospective | 1  | South Korea | 64  | Mixed | Hydrocephalus with insertion of EV drain or VP shunt                                              | Existing EVD/VPS, no CT images 3 days before surgery | Intraventricular pressure monitor   | 8   | 56  | 12.5  |
| Marshall (1983) | 1983 | <i>J Neurosurg</i>              | Prospective   | 1  | USA         | 15  | Mixed | Adult patients admitted to Neurosurgical Service with placement of ICP monitor                    | None listed                                          | Intraventricular pressure monitor   | 6   | 9   | 40    |
| Miller (1977)   | 1977 | <i>J Neurosurg</i>              | Prospective   | 1  | USA         | 160 | TBI   | Adult patients with blunt head injury and decreased level of consciousness                        | Brain death diagnosis                                | Intraventricular pressure monitor   | 64  | 96  | 40    |
| Moretti (2009)  | 2009 | <i>Neurocrit Care</i>           | Prospective   | 1  | Italy       | 94  | Mixed | Adult patients admitted to Neurosurgical Service with placement of ICP monitor                    | None listed                                          | Intraventricular pressure monitor   | 29  | 65  | 30.85 |
| Nagel (2009)    | 2009 | <i>J Neurosurg</i>              | Prospective   | 1  | Germany     | 182 | SAH   | Aneurysmal SAH with placement of ICP monitor                                                      | None listed                                          | Intraparenchymal pressure monitor   | 18  | 164 | 9.89  |
| Narayan (1982)  | 1982 | <i>J Neurosurg</i>              | Prospective   | 1  | USA         | 61  | TBI   | Adult patients with severe TBI, inability to utter recognizable words following initial treatment | Gunshot wounds to the heads; brain death diagnosis   | Intraventricular pressure monitor   | 8   | 53  | 13.11 |
| Nirula (2014)   | 2014 | <i>J Trauma Acute Care Surg</i> | Retrospective | 11 | USA         | 420 | TBI   | Age 16 or older; Blunt TBI; GCS of 13 or less;                                                    | None listed                                          | Emergency Decompressive Craniectomy | 210 | 210 | 50    |
| Pace (2018)     | 2018 | <i>J Trauma Acute Care Surg</i> | Retrospective | 1  | Canada      | 46  | TBI   | Age 18 or older; Blunt TBI;                                                                       | CT imaging prior to transport to                     | Intraparenchymal or                 | 19  | 27  | 41.30 |

Diagnosis of Elevated Intracranial Pressure - Systematic Review – Supplement

|                 |      |                       |               |   |                |     |               |                                                                                  |                                                                     |                                                       |                        |     |       |
|-----------------|------|-----------------------|---------------|---|----------------|-----|---------------|----------------------------------------------------------------------------------|---------------------------------------------------------------------|-------------------------------------------------------|------------------------|-----|-------|
|                 |      |                       |               |   |                |     |               | completion of head CT scan                                                       | peripheral hospital; died in the ED and did not undergo CT scanning | intraventricular pressure monitor                     |                        |     |       |
| Raffiz (2012)   | 2012 | <i>Am J Emerg Med</i> | Prospective   | 1 | Malaysia       | 41  | Mixed         | Adult patients admitted to Neurosurgical Service with placement of ICP monitor   | None listed                                                         | Intraparenchymal or intraventricular pressure monitor | ONLY FOR ONSD ANALYSIS |     |       |
| Rajajee (2011)  | 2011 | <i>Neurocrit Care</i> | Prospective   | 1 | USA            | 65  | Mixed         | Adult patients admitted to Neurosurgical Service with placement of ICP monitor   | Age <18; Ocular pathology;                                          | Intraparenchymal or intraventricular pressure monitor | 26                     | 39  | 40    |
| Rajajee (2018)  | 2018 | <i>Neurocrit Care</i> | Retrospective | 1 | USA            | 23  | Liver Disease | Acute Liver Failure patients with placement of ICP monitor                       | Poor quality of non-invasive measurements                           | Intraparenchymal or intraventricular pressure monitor | 11                     | 12  | 47.83 |
| Rasulo (2017)   | 2017 | <i>Crit Care</i>      | Prospective   | 6 | Italy          | 38  | Mixed         | Adult patients admitted to Neurocritical Care Unit with placement of ICP monitor | Poor ultrasound window; decompressive craniectomy; ICP treatment    | Intraparenchymal or intraventricular pressure monitor |                        |     |       |
| Robba (2017)    | 2017 | <i>PLoS Med</i>       | Prospective   | 1 | United Kingdom | 445 | Mixed         | Adult patients admitted to Neurosurgical Service with placement of ICP monitor   | None listed                                                         | Intraparenchymal or intraventricular pressure monitor | 86                     | 359 | 19.33 |
| Sadhu (1979)    | 1979 | <i>Radiology</i>      | Retrospective | 1 | USA            | 33  | TBI           | TBI patients admitted to neurosurgical ward                                      | None listed                                                         | Intraventricular pressure monitor                     | 8                      | 25  | 24.24 |
| Selhorst (1985) | 1985 | <i>Neurosurgery</i>   | Prospective   | 1 | USA            | 21  | TBI           | TBI patients admitted to neurosurgical ward                                      | None listed                                                         | Intraparenchymal pressure monitor                     | 18                     | 3   | 85.71 |
| Soldatos (2008) | 2008 | <i>Crit Care</i>      | Prospective   | 1 | Greece         | 32  | TBI           | TBI patients admitted to                                                         | Age <18; Ocular Pathology;                                          | Intraparenchymal pressure monitor                     | 27                     | 5   | 84.38 |

## Diagnosis of Elevated Intracranial Pressure - Systematic Review – Supplement

|                   |      |                                      |               |   |                |     |     |                                                                                |                                                                                |                                                                     |                       |     |       |  |
|-------------------|------|--------------------------------------|---------------|---|----------------|-----|-----|--------------------------------------------------------------------------------|--------------------------------------------------------------------------------|---------------------------------------------------------------------|-----------------------|-----|-------|--|
|                   |      |                                      |               |   |                |     |     | neurosurgical ward                                                             |                                                                                |                                                                     |                       |     |       |  |
| Soliman (2018)    | 2018 | <i>Crit Care Res Pract</i>           | Prospective   | 1 | Saudi Arabia   | 200 | TBI | TBI patients admitted to neurosurgical ward                                    | Age <18; Ocular Pathology;                                                     | Intraparenchymal pressure monitor                                   | 177                   | 23  | 88.5  |  |
| Soustiel (2010)   | 2010 | <i>Neurosurgery</i>                  | Prospective   | 1 | Israel         | 122 | TBI | Adult patients admitted to Neurosurgical Service with placement of ICP monitor | Decompressive craniectomy performed for any other reason other than ICP relief | Emergency Decompressive Craniectomy                                 | 36                    | 86  | 29.51 |  |
| Tabaddor (1982)   | 1982 | <i>Surg Neurol</i>                   | Retrospective | 1 | USA            | 36  | TBI | TBI patients admitted to neurosurgical ward                                    | None listed                                                                    | Intraventricular pressure monitor                                   | 23                    | 13  | 63.89 |  |
| Teasdale (1984)   | 1984 | <i>J Neurol Neurosurg Psychiatry</i> | Retrospective | 1 | Scotland       | 37  | TBI | TBI patients, comatose                                                         | None listed                                                                    | Intraventricular pressure monitor                                   | 14                    | 23  | 37.84 |  |
| Wettersvik (2018) | 2018 | <i>Acta Neurochir</i>                | Retrospective | 1 | Sweden         | 602 | TBI | TBI patients admitted to neurosurgical ward                                    | None listed                                                                    | Emergency Decompressive Craniectomy OR Thiopental for increased ICP | 58                    | 544 | 9.63  |  |
| Zoerle (2015)     | 2015 | <i>Crit Care Med</i>                 | Retrospective | 1 | Italy          | 116 | SAH | Aneurysmal SAH with placement of ICP monitor                                   | Imaging data unavailable                                                       | Intraventricular pressure monitor                                   | 42                    | 74  | 36.21 |  |
| Zweifel (2012)    | 2012 | <i>Neurosurgery</i>                  | Prospective   | 1 | United Kingdom | 290 | TBI | TBI with ICP monitor placed                                                    | None listed                                                                    | Intraparenchymal pressure monitor                                   | ONLY FOR TCD ANALYSIS |     |       |  |

**Supplemental Figure 2:** QUADAS-2 Quality Assessment for Risk of Bias and Applicability of the 40 Included Studies.

|                  | Risk of Bias      |            |                    |                 | Applicability Concerns |            |                    |
|------------------|-------------------|------------|--------------------|-----------------|------------------------|------------|--------------------|
|                  | Patient Selection | Index Test | Reference Standard | Flow and Timing | Patient Selection      | Index Test | Reference Standard |
| Badri 2012       | +                 | ?          | +                  | ?               | +                      | +          | +                  |
| Cardim 2012      | ?                 | +          | +                  | +               | ?                      | +          | +                  |
| Colquhoun 1989   | ?                 | +          | +                  | +               | ?                      | +          | +                  |
| Donavan 1998     | +                 | ?          | +                  | ?               | ?                      | ?          | +                  |
| Frumin 2014      | ?                 | +          | +                  | +               | +                      | +          | +                  |
| Galbraith 1981   | ?                 | +          | +                  | ?               | ?                      | +          | +                  |
| Geeraerts 2007   | +                 | +          | +                  | +               | +                      | +          | +                  |
| Hamani 2003      | +                 | +          | +                  | +               | +                      | +          | +                  |
| Hara 1998        | +                 | +          | +                  | +               | +                      | +          | +                  |
| Hayashi 1982     | ?                 | +          | +                  | ?               | +                      | +          | +                  |
| Heuer 2004       | +                 | +          | +                  | +               | +                      | +          | +                  |
| Hukkelhoven 2005 | +                 | +          | +                  | +               | +                      | +          | +                  |
| Jeon 2017        | +                 | +          | +                  | +               | +                      | +          | +                  |
| Jeon 2018        | ?                 | +          | +                  | +               | ?                      | +          | +                  |
| Kamel 2012       | +                 | +          | ?                  | +               | +                      | +          | ?                  |
| Kimberly 2007    | +                 | +          | +                  | +               | +                      | +          | +                  |
| Kramer 2016      | +                 | +          | +                  | ?               | ?                      | +          | +                  |
| Lee 2018         | ?                 | ?          | +                  | ?               | ?                      | ?          | +                  |
| Marshall 1983    | +                 | +          | +                  | +               | +                      | +          | +                  |
| Miller 1977      | +                 | +          | +                  | +               | +                      | +          | +                  |
| Moretti 2009     | +                 | +          | +                  | +               | +                      | +          | +                  |
| Nagel 2009       | +                 | +          | +                  | ?               | +                      | +          | +                  |
| Narayan 1982     | +                 | +          | +                  | +               | +                      | +          | +                  |
| Nirula 2014      | +                 | +          | +                  | +               | +                      | +          | +                  |
| Pace 2018        | +                 | +          | +                  | +               | +                      | +          | +                  |
| Raffiz 2017      | +                 | +          | +                  | +               | +                      | +          |                    |
| Rajajee 2011     | +                 | +          | +                  | +               | +                      | +          | +                  |
| Rajajee 2018     | +                 | +          | +                  | +               | +                      | +          | +                  |
| Robba 2017       | +                 | +          | +                  | +               | +                      | +          | +                  |
| Sadhu 1979       | ?                 | +          | +                  | +               | ?                      | +          | +                  |
| Selhorst 1985    | ?                 | +          | ?                  | ?               | ?                      | +          | ?                  |
| Soldatos 2008    | +                 | +          | +                  | +               | +                      | +          | +                  |
| Soliman 2018     | +                 | +          | +                  | +               | +                      | +          | +                  |
| Soustiel 2010    | +                 | +          | +                  | +               | +                      | +          | +                  |
| Tabaddor 1982    | +                 | +          | +                  | +               | +                      | +          | +                  |
| Teasdale 1984    | +                 | +          | +                  | +               | +                      | +          | +                  |
| Wettervik 2018   | +                 | +          | +                  | +               | +                      | +          | +                  |
| Zoerle 2015      | +                 | +          | +                  | +               | ?                      | +          | +                  |
| Zweifel 2012     | +                 | +          | +                  | +               | +                      | +          | +                  |

● High     
 ? Unclear     
 + Low

# Diagnosis of Elevated Intracranial Pressure - Systematic Review – Supplement

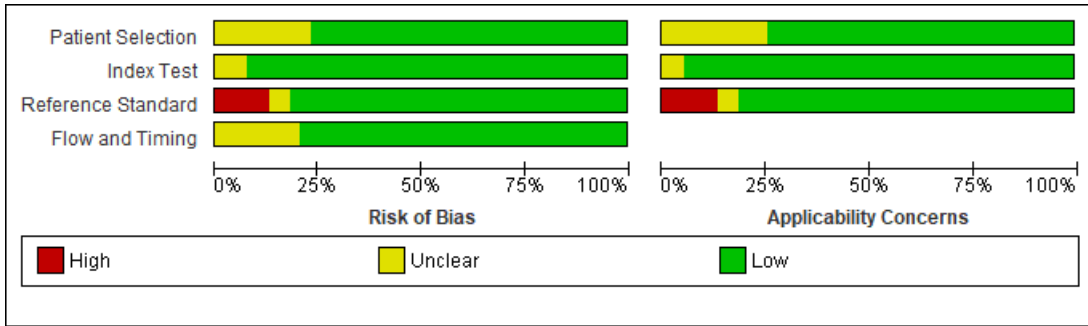

**Supplemental Table 3:** Grading of Recommendations, Assessment, Development, and Evaluations (GRADE) Evidence Profile – Pupillary Dilation

**Question:** Should pupillary dilation be used to diagnose elevated intracranial pressure in critically ill patients?

| Sensitivity                                                                                              | 0.28 (95% CI: 0.16 to 0.45)    |                                                 |                                                 | Prevalences  |               |                      | 30%              | 50%                              | 70%                         |                             |                   |
|----------------------------------------------------------------------------------------------------------|--------------------------------|-------------------------------------------------|-------------------------------------------------|--------------|---------------|----------------------|------------------|----------------------------------|-----------------------------|-----------------------------|-------------------|
| Specificity                                                                                              | 0.86 (95% CI: 0.75 to 0.93)    |                                                 |                                                 |              |               |                      |                  |                                  |                             |                             |                   |
| Outcome                                                                                                  | No of studies (No of patients) | Study design                                    | Factors that may decrease certainty of evidence |              |               |                      |                  | Effect per 1,000 patients tested |                             |                             | Test accuracy CoE |
|                                                                                                          |                                |                                                 | Risk of bias                                    | Indirectness | Inconsistency | Imprecision          | Publication bias | pre-test probability of 30%      | pre-test probability of 50% | pre-test probability of 70% |                   |
| <b>True positives</b><br>(patients with elevated intracranial pressure)                                  | 10 studies<br>2126 patients    | cross-sectional<br>(cohort type accuracy study) | not serious                                     | not serious  | not serious   | serious <sup>a</sup> | none             | 85 (48 to 134)                   | 141 (80 to 224)             | 197 (112 to 314)            | ⊕⊕⊕○<br>MODERATE  |
| <b>False negatives</b><br>(patients incorrectly classified as not having elevated intracranial pressure) |                                |                                                 |                                                 |              |               |                      |                  | 215 (166 to 252)                 | 359 (276 to 420)            | 503 (386 to 588)            |                   |
| <b>True negatives</b><br>(patients without elevated intracranial pressure)                               | 10 studies<br>2126 patients    | cross-sectional<br>(cohort type accuracy study) | not serious                                     | not serious  | not serious   | serious <sup>a</sup> | none             | 601 (524 to 648)                 | 430 (375 to 463)            | 258 (225 to 278)            |                   |
| <b>False positives</b><br>(patients incorrectly classified as having elevated intracranial pressure)     |                                |                                                 |                                                 |              |               |                      |                  | 99 (52 to 176)                   | 70 (37 to 125)              | 42 (22 to 75)               |                   |

**Explanations**

a. Confidence intervals for sensitivity and specificity are wide and do not exclude important differences.

**Supplemental Table 4:** Grading of Recommendations, Assessment, Development, and Evaluations (GRADE) Evidence Profile – Motor Posturing

**Question:** Should motor posturing be used to diagnose elevated intracranial pressure in critically ill patients?

| Sensitivity                                                                                              | 0.54 (95% CI: 0.37 to 0.71)    |                                              | Prevalences                                     |              |               | 30%                  | 50%              | 70%                              |                             |                             |                   |
|----------------------------------------------------------------------------------------------------------|--------------------------------|----------------------------------------------|-------------------------------------------------|--------------|---------------|----------------------|------------------|----------------------------------|-----------------------------|-----------------------------|-------------------|
| Specificity                                                                                              | 0.64 (95% CI: 0.47 to 0.78)    |                                              |                                                 |              |               |                      |                  |                                  |                             |                             |                   |
| Outcome                                                                                                  | No of studies (No of patients) | Study design                                 | Factors that may decrease certainty of evidence |              |               |                      |                  | Effect per 1,000 patients tested |                             |                             | Test accuracy CoE |
|                                                                                                          |                                |                                              | Risk of bias                                    | Indirectness | Inconsistency | Imprecision          | Publication bias | pre-test probability of 30%      | pre-test probability of 50% | pre-test probability of 70% |                   |
| <b>True positives</b><br>(patients with elevated intracranial pressure)                                  | 6 studies<br>830 patients      | cross-sectional (cohort type accuracy study) | serious <sup>a</sup>                            | not serious  | not serious   | serious <sup>b</sup> | none             | 163 (110 to 213)                 | 272 (183 to 355)            | 380 (256 to 497)            | ⊕⊕○○<br>LOW       |
| <b>False negatives</b><br>(patients incorrectly classified as not having elevated intracranial pressure) |                                |                                              |                                                 |              |               |                      |                  | 137 (87 to 190)                  | 228 (145 to 317)            | 320 (203 to 444)            |                   |
| <b>True negatives</b><br>(patients without elevated intracranial pressure)                               | 6 studies<br>830 patients      | cross-sectional (cohort type accuracy study) | serious <sup>a</sup>                            | not serious  | not serious   | serious <sup>b</sup> | none             | 445 (326 to 545)                 | 318 (233 to 389)            | 191 (140 to 233)            | ⊕⊕○○<br>LOW       |
| <b>False positives</b><br>(patients incorrectly classified as having elevated intracranial pressure)     |                                |                                              |                                                 |              |               |                      |                  | 255 (155 to 374)                 | 182 (111 to 267)            | 109 (67 to 160)             |                   |

**Explanations**

- a. Majority of included studies at high risk of bias.
- b. Confidence intervals for sensitivity and specificity are wide and do not exclude important differences.

**Supplemental Table 5:** Grading of Recommendations, Assessment, Development, and Evaluations (GRADE) Evidence Profile – GCS ≤ 8

**Question:** Should GCS ≤ 8 be used to diagnose elevated intracranial pressure in critically ill patients?

| Sensitivity                                                                                              | 0.76 (95% CI: 0.62 to 0.85)    |                                              | Prevalences                                     |              |                      | 30%                  | 50%              | 70%                              |                             |                             |                   |
|----------------------------------------------------------------------------------------------------------|--------------------------------|----------------------------------------------|-------------------------------------------------|--------------|----------------------|----------------------|------------------|----------------------------------|-----------------------------|-----------------------------|-------------------|
| Specificity                                                                                              | 0.40 (95% CI: 0.27 to 0.55)    |                                              |                                                 |              |                      |                      |                  |                                  |                             |                             |                   |
| Outcome                                                                                                  | No of studies (No of patients) | Study design                                 | Factors that may decrease certainty of evidence |              |                      |                      |                  | Effect per 1,000 patients tested |                             |                             | Test accuracy CoE |
|                                                                                                          |                                |                                              | Risk of bias                                    | Indirectness | Inconsistency        | Imprecision          | Publication bias | pre-test probability of 30%      | pre-test probability of 50% | pre-test probability of 70% |                   |
| <b>True positives</b><br>(patients with elevated intracranial pressure)                                  | 10 studies<br>2234 patients    | cross-sectional (cohort type accuracy study) | not serious                                     | not serious  | serious <sup>a</sup> | serious <sup>b</sup> | none             | 227 (187 to 257)                 | 379 (312 to 428)            | 531 (437 to 598)            | ⊕⊕○○<br>LOW       |
| <b>False negatives</b><br>(patients incorrectly classified as not having elevated intracranial pressure) |                                |                                              |                                                 |              |                      |                      |                  | 73 (43 to 113)                   | 121 (72 to 188)             | 169 (102 to 263)            |                   |
| <b>True negatives</b><br>(patients without elevated intracranial pressure)                               | 10 studies<br>2234 patients    | cross-sectional (cohort type accuracy study) | not serious                                     | not serious  | serious <sup>a</sup> | serious <sup>b</sup> | none             | 279 (188 to 382)                 | 200 (135 to 273)            | 120 (81 to 164)             | ⊕⊕○○<br>LOW       |
| <b>False positives</b><br>(patients incorrectly classified as having elevated intracranial pressure)     |                                |                                              |                                                 |              |                      |                      |                  | 421 (318 to 512)                 | 300 (227 to 365)            | 180 (136 to 219)            |                   |

**Explanations**

- a. Variation in sensitivity and specificity amongst included studies.
- b. Confidence intervals for sensitivity and specificity are wide and do not exclude important differences.



**Supplemental Table 6:** Grading of Recommendations, Assessment, Development, and Evaluations (GRADE) Evidence Profile – Basal Cisterns

**Question:** Should compression or absence of basal cisterns on CT imaging be used to diagnose elevated intracranial pressure in critically ill patients?

| Sensitivity                                                                                              |                              | 0.86 (95% CI: 0.58 to 0.96)                     |                                                 |              |               |                      |                  | Prevalences                      |                             |                             | 30%               | 50% | 70% |
|----------------------------------------------------------------------------------------------------------|------------------------------|-------------------------------------------------|-------------------------------------------------|--------------|---------------|----------------------|------------------|----------------------------------|-----------------------------|-----------------------------|-------------------|-----|-----|
| Specificity                                                                                              |                              | 0.61 (95% CI: 0.29 to 0.86)                     |                                                 |              |               |                      |                  |                                  |                             |                             |                   |     |     |
| Outcome                                                                                                  | № of studies (№ of patients) | Study design                                    | Factors that may decrease certainty of evidence |              |               |                      |                  | Effect per 1,000 patients tested |                             |                             | Test accuracy CoE |     |     |
|                                                                                                          |                              |                                                 | Risk of bias                                    | Indirectness | Inconsistency | Imprecision          | Publication bias | pre-test probability of 30%      | pre-test probability of 50% | pre-test probability of 70% |                   |     |     |
| <b>True positives</b><br>(patients with elevated intracranial pressure)                                  | 5 studies<br>619 patients    | cross-sectional<br>(cohort type accuracy study) | not serious                                     | not serious  | not serious   | serious <sup>a</sup> | none             | 258 (174 to 289)                 | 430 (290 to 482)            | 601 (406 to 675)            | ⊕⊕⊕○<br>MODERATE  |     |     |
| <b>False negatives</b><br>(patients incorrectly classified as not having elevated intracranial pressure) |                              |                                                 |                                                 |              |               |                      |                  | 42 (11 to 126)                   | 70 (18 to 210)              | 99 (25 to 294)              |                   |     |     |
| <b>True negatives</b><br>(patients without elevated intracranial pressure)                               | 5 studies<br>619 patients    | cross-sectional<br>(cohort type accuracy study) | not serious                                     | not serious  | not serious   | serious <sup>a</sup> | none             | 427 (204 to 599)                 | 305 (146 to 428)            | 183 (87 to 257)             | ⊕⊕⊕○<br>MODERATE  |     |     |
| <b>False positives</b><br>(patients incorrectly classified as having elevated intracranial pressure)     |                              |                                                 |                                                 |              |               |                      |                  | 273 (101 to 496)                 | 195 (72 to 354)             | 117 (43 to 213)             |                   |     |     |

**Explanations**

a. Confidence intervals for sensitivity and specificity are wide and do not exclude important differences.

**Supplemental Table 7:** Grading of Recommendations, Assessment, Development, and Evaluations (GRADE) Evidence Profile – Any Midline Shift

**Question:** Should midline shift >0mm be used to diagnose elevated intracranial pressure in critically ill patients?

| Sensitivity                                                                                              |                              | 0.81 (95% CI: 0.64 to 0.91)                     |                                                 |              |               |                      |                  | Prevalences                      |                             |                             | 30%               | 50% | 70% |
|----------------------------------------------------------------------------------------------------------|------------------------------|-------------------------------------------------|-------------------------------------------------|--------------|---------------|----------------------|------------------|----------------------------------|-----------------------------|-----------------------------|-------------------|-----|-----|
| Specificity                                                                                              |                              | 0.43 (95% CI: 0.24 to 0.64)                     |                                                 |              |               |                      |                  |                                  |                             |                             |                   |     |     |
| Outcome                                                                                                  | № of studies (№ of patients) | Study design                                    | Factors that may decrease certainty of evidence |              |               |                      |                  | Effect per 1,000 patients tested |                             |                             | Test accuracy CoE |     |     |
|                                                                                                          |                              |                                                 | Risk of bias                                    | Indirectness | Inconsistency | Imprecision          | Publication bias | pre-test probability of 30%      | pre-test probability of 50% | pre-test probability of 70% |                   |     |     |
| <b>True positives</b><br>(patients with elevated intracranial pressure)                                  | 8 studies<br>627 patients    | cross-sectional<br>(cohort type accuracy study) | not serious                                     | not serious  | not serious   | serious <sup>a</sup> | none             | 243 (193 to 273)                 | 405 (322 to 455)            | 566 (450 to 636)            | ⊕⊕⊕○<br>MODERATE  |     |     |
| <b>False negatives</b><br>(patients incorrectly classified as not having elevated intracranial pressure) |                              |                                                 |                                                 |              |               |                      |                  | 57 (27 to 107)                   | 95 (45 to 178)              | 134 (64 to 250)             |                   |     |     |
| <b>True negatives</b><br>(patients without elevated intracranial pressure)                               | 8 studies<br>627 patients    | cross-sectional<br>(cohort type accuracy study) | not serious                                     | not serious  | not serious   | serious <sup>a</sup> | none             | 299 (168 to 446)                 | 214 (120 to 319)            | 128 (72 to 191)             | ⊕⊕⊕○<br>MODERATE  |     |     |
| <b>False positives</b><br>(patients incorrectly classified as having elevated intracranial pressure)     |                              |                                                 |                                                 |              |               |                      |                  | 401 (254 to 532)                 | 286 (181 to 380)            | 172 (109 to 228)            |                   |     |     |

**Explanations**

a. Confidence intervals for sensitivity and specificity are wide and do not exclude important differences.

## Diagnosis of Elevated Intracranial Pressure - Systematic Review – Supplement

### **Supplemental Table 8:** Grading of Recommendations, Assessment, Development, and Evaluations (GRADE) Evidence Profile – Midline Shift $\geq 5$ mm.

**Question:** Should midline shift  $>5$ mm be used to diagnose elevated intracranial pressure in critically ill patients?

| Sensitivity                                                                                              |                              | 0.49 (95% CI: 0.34 to 0.64)                     |                                                 |              |                      |             |                  |                                  |                             |                             |                   |
|----------------------------------------------------------------------------------------------------------|------------------------------|-------------------------------------------------|-------------------------------------------------|--------------|----------------------|-------------|------------------|----------------------------------|-----------------------------|-----------------------------|-------------------|
| Specificity                                                                                              |                              | 0.70 (95% CI: 0.55 to 0.82)                     |                                                 |              |                      |             |                  |                                  |                             |                             |                   |
|                                                                                                          |                              | Prevalences                                     |                                                 |              |                      | 30%         | 50%              | 70%                              |                             |                             |                   |
| Outcome                                                                                                  | № of studies (№ of patients) | Study design                                    | Factors that may decrease certainty of evidence |              |                      |             |                  | Effect per 1,000 patients tested |                             |                             | Test accuracy CoE |
|                                                                                                          |                              |                                                 | Risk of bias                                    | Indirectness | Inconsistency        | Imprecision | Publication bias | pre-test probability of 30%      | pre-test probability of 50% | pre-test probability of 70% |                   |
| <b>True positives</b><br>(patients with elevated intracranial pressure)                                  | 9 studies<br>832 patients    | cross-sectional<br>(cohort type accuracy study) | not serious                                     | not serious  | serious <sup>a</sup> | not serious | none             | 148 (104 to 193)                 | 247 (173 to 322)            | 346 (241 to 451)            | ⊕⊕⊕○<br>MODERATE  |
| <b>False negatives</b><br>(patients incorrectly classified as not having elevated intracranial pressure) |                              |                                                 |                                                 |              |                      |             |                  | 152 (107 to 196)                 | 253 (178 to 327)            | 354 (249 to 459)            |                   |
| <b>True negatives</b><br>(patients without elevated intracranial pressure)                               | 9 studies<br>832 patients    | cross-sectional<br>(cohort type accuracy study) | not serious                                     | not serious  | serious <sup>a</sup> | not serious | none             | 490 (384 to 573)                 | 350 (275 to 409)            | 210 (165 to 245)            | ⊕⊕⊕○<br>MODERATE  |
| <b>False positives</b><br>(patients incorrectly classified as having elevated intracranial pressure)     |                              |                                                 |                                                 |              |                      |             |                  | 210 (127 to 316)                 | 150 (91 to 225)             | 90 (55 to 135)              |                   |

#### Explanations

a. Variation in sensitivity and specificity amongst included studies.

Diagnosis of Elevated Intracranial Pressure - Systematic Review – Supplement

**Supplemental Table 9:** Grading of Recommendations, Assessment, Development, and Evaluations (GRADE) Evidence Profile – Midline Shift  $\geq 10$ mm.

**Question:** Should midline shift  $>10$ mm be used to diagnose elevated intracranial pressure in critically ill patients?

| Sensitivity                                                                                              | 0.21 (95% CI: 0.13 to 0.31)    |                                                 |                                                 | Prevalences  |               |             | 30%              | 50%                              | 70%                         |                             |                   |
|----------------------------------------------------------------------------------------------------------|--------------------------------|-------------------------------------------------|-------------------------------------------------|--------------|---------------|-------------|------------------|----------------------------------|-----------------------------|-----------------------------|-------------------|
| Specificity                                                                                              | 0.89 (95% CI: 0.78 to 0.95)    |                                                 |                                                 |              |               |             |                  |                                  |                             |                             |                   |
| Outcome                                                                                                  | No of studies (No of patients) | Study design                                    | Factors that may decrease certainty of evidence |              |               |             |                  | Effect per 1,000 patients tested |                             |                             | Test accuracy CoE |
|                                                                                                          |                                |                                                 | Risk of bias                                    | Indirectness | Inconsistency | Imprecision | Publication bias | pre-test probability of 30%      | pre-test probability of 50% | pre-test probability of 70% |                   |
| <b>True positives</b><br>(patients with elevated intracranial pressure)                                  | 8 studies<br>651 patients      | cross-sectional<br>(cohort type accuracy study) | not serious                                     | not serious  | not serious   | not serious | none             | 62 (39 to 94)                    | 104 (65 to 157)             | 145 (91 to 219)             | ⊕⊕⊕⊕<br>HIGH      |
| <b>False negatives</b><br>(patients incorrectly classified as not having elevated intracranial pressure) |                                |                                                 |                                                 |              |               |             |                  | 238 (206 to 261)                 | 396 (343 to 435)            | 555 (481 to 609)            |                   |
| <b>True negatives</b><br>(patients without elevated intracranial pressure)                               | 8 studies<br>651 patients      | cross-sectional<br>(cohort type accuracy study) | not serious                                     | not serious  | not serious   | not serious | none             | 624 (543 to 666)                 | 446 (388 to 476)            | 268 (233 to 286)            | ⊕⊕⊕⊕<br>HIGH      |
| <b>False positives</b><br>(patients incorrectly classified as having elevated intracranial pressure)     |                                |                                                 |                                                 |              |               |             |                  | 76 (34 to 157)                   | 54 (24 to 112)              | 32 (14 to 67)               |                   |

**Supplemental Table 10:** Grading of Recommendations, Assessment, Development, and Evaluations (GRADE) Evidence Profile – Marshall Score  $\geq 3$ .

## Diagnosis of Elevated Intracranial Pressure - Systematic Review – Supplement

**Question:** Should Marshall score  $\geq 3$  be used to diagnose elevated intracranial pressure in critically ill patients?

| Sensitivity                                                                                              |                              | 0.81 (95% CI: 0.64 to 0.91)                     |                                                 |              |                |                      |                  |                                  |                             |                             |                   |
|----------------------------------------------------------------------------------------------------------|------------------------------|-------------------------------------------------|-------------------------------------------------|--------------|----------------|----------------------|------------------|----------------------------------|-----------------------------|-----------------------------|-------------------|
| Specificity                                                                                              |                              | 0.60 (95% CI: 0.41 to 0.76)                     |                                                 |              |                |                      |                  |                                  |                             |                             |                   |
|                                                                                                          |                              | Prevalences                                     |                                                 |              | 30%            | 50%                  | 70%              |                                  |                             |                             |                   |
| Outcome                                                                                                  | № of studies (№ of patients) | Study design                                    | Factors that may decrease certainty of evidence |              |                |                      |                  | Effect per 1,000 patients tested |                             |                             | Test accuracy CoE |
|                                                                                                          |                              |                                                 | Risk of bias                                    | Indirectness | Inconsistency  | Imprecision          | Publication bias | pre-test probability of 30%      | pre-test probability of 50% | pre-test probability of 70% |                   |
| <b>True positives</b><br>(patients with elevated intracranial pressure)                                  | 4 studies<br>1316 patients   | cross-sectional<br>(cohort type accuracy study) | serious <sup>a</sup>                            | not serious  | not serious    | serious <sup>b</sup> | none             | 242 (191 to 273)                 | 403 (318 to 455)            | 564 (444 to 636)            | ⊕⊕○○<br>LOW       |
| <b>False negatives</b><br>(patients incorrectly classified as not having elevated intracranial pressure) |                              |                                                 |                                                 |              |                |                      |                  | 58 (27 to 109)                   | 97 (45 to 182)              | 136 (64 to 256)             |                   |
| <b>True negatives</b><br>(patients without elevated intracranial pressure)                               | 4 studies<br>1316 patients   | cross-sectional<br>(cohort type accuracy study) | serious <sup>a</sup>                            | not serious  | not serious </ | serious <sup>b</sup> | none             | 419 (286 to 535)                 | 300 (205 to 382)            | 180 (123 to 229)            | ⊕⊕○○<br>LOW       |
| <b>False positives</b><br>(patients incorrectly classified as having elevated intracranial pressure)     |                              |                                                 |                                                 |              |                |                      |                  | 281 (165 to 414)                 | 200 (118 to 295)            | 120 (71 to 177)             |                   |

### Explanations

- a. The majority of the included studies were at high risk of bias.
- b. Confidence intervals for sensitivity and specificity are wide and do not exclude important differences.

### **Supplemental Table 11:** Grading of Recommendations, Assessment, Development, and Evaluations (GRADE) Evidence Profile – Marshall Score $\geq 4$ .

**Question:** Should Marshall score  $\geq 4$  be used to diagnose elevated intracranial pressure in critically ill patients?

## Diagnosis of Elevated Intracranial Pressure - Systematic Review – Supplement

| Sensitivity                                                                                              | 0.54 (95% CI: 0.37 to 0.70)  |                                                 | Prevalences 30% 50% 70%                         |              |               |                      |                  |                                  |                             |                             |                   |
|----------------------------------------------------------------------------------------------------------|------------------------------|-------------------------------------------------|-------------------------------------------------|--------------|---------------|----------------------|------------------|----------------------------------|-----------------------------|-----------------------------|-------------------|
| Specificity                                                                                              | 0.77 (95% CI: 0.63 to 0.87)  |                                                 |                                                 |              |               |                      |                  |                                  |                             |                             |                   |
| Outcome                                                                                                  | № of studies (№ of patients) | Study design                                    | Factors that may decrease certainty of evidence |              |               |                      |                  | Effect per 1,000 patients tested |                             |                             | Test accuracy CoE |
|                                                                                                          |                              |                                                 | Risk of bias                                    | Indirectness | Inconsistency | Imprecision          | Publication bias | pre-test probability of 30%      | pre-test probability of 50% | pre-test probability of 70% |                   |
| <b>True positives</b><br>(patients with elevated intracranial pressure)                                  | 4 studies<br>1316 patients   | cross-sectional<br>(cohort type accuracy study) | serious <sup>a</sup>                            | not serious  | not serious   | serious <sup>b</sup> | none             | 163 (112 to 210)                 | 271 (187 to 351)            | 379 (262 to 491)            | ⊕⊕○○<br>LOW       |
| <b>False negatives</b><br>(patients incorrectly classified as not having elevated intracranial pressure) |                              |                                                 |                                                 |              |               |                      |                  | 137 (90 to 188)                  | 229 (149 to 313)            | 321 (209 to 438)            |                   |
| <b>True negatives</b><br>(patients without elevated intracranial pressure)                               | 4 studies<br>1316 patients   | cross-sectional<br>(cohort type accuracy study) | serious <sup>a</sup>                            | not serious  | not serious   | serious <sup>b</sup> | none             | 538 (438 to 608)                 | 385 (313 to 435)            | 231 (188 to 261)            | ⊕⊕○○<br>LOW       |
| <b>False positives</b><br>(patients incorrectly classified as having elevated intracranial pressure)     |                              |                                                 |                                                 |              |               |                      |                  | 162 (92 to 262)                  | 115 (65 to 187)             | 69 (39 to 112)              |                   |

### Explanations

- a. The majority of the included studies were at a high risk of bias.  
 b. Confidence intervals for sensitivity and specificity are wide and do not exclude important differences.

### **Supplemental Table 12:** Grading of Recommendations, Assessment, Development, and Evaluations (GRADE) Evidence Profile – Marshall Score $\geq 5$ .

**Question:** Should Marshall score  $\geq 5$  be used to diagnose elevated intracranial pressure in critically ill patients?

## Diagnosis of Elevated Intracranial Pressure - Systematic Review – Supplement

| Sensitivity                                                                                              | 0.45 (95% CI: 0.28 to 0.63)  |                                                 | Prevalences 30% 50% 70%                         |              |               |                      |                  |                                  |                             |                             |                   |
|----------------------------------------------------------------------------------------------------------|------------------------------|-------------------------------------------------|-------------------------------------------------|--------------|---------------|----------------------|------------------|----------------------------------|-----------------------------|-----------------------------|-------------------|
| Specificity                                                                                              | 0.83 (95% CI: 0.70 to 0.92)  |                                                 |                                                 |              |               |                      |                  |                                  |                             |                             |                   |
| Outcome                                                                                                  | № of studies (№ of patients) | Study design                                    | Factors that may decrease certainty of evidence |              |               |                      |                  | Effect per 1,000 patients tested |                             |                             | Test accuracy CoE |
|                                                                                                          |                              |                                                 | Risk of bias                                    | Indirectness | Inconsistency | Imprecision          | Publication bias | pre-test probability of 30%      | pre-test probability of 50% | pre-test probability of 70% |                   |
| <b>True positives</b><br>(patients with elevated intracranial pressure)                                  | 4 studies<br>1316 patients   | cross-sectional<br>(cohort type accuracy study) | serious <sup>a</sup>                            | not serious  | not serious   | serious <sup>b</sup> | none             | 135 (85 to 188)                  | 226 (143 to 314)            | 316 (199 to 440)            | ⊕⊕○○<br>LOW       |
| <b>False negatives</b><br>(patients incorrectly classified as not having elevated intracranial pressure) |                              |                                                 |                                                 |              |               |                      |                  | 165 (112 to 215)                 | 274 (186 to 357)            | 384 (260 to 501)            |                   |
| <b>True negatives</b><br>(patients without elevated intracranial pressure)                               | 4 studies<br>1316 patients   | cross-sectional<br>(cohort type accuracy study) | serious <sup>a</sup>                            | not serious  | not serious   | serious <sup>b</sup> | none             | 584 (493 to 641)                 | 418 (352 to 458)            | 251 (211 to 275)            | ⊕⊕○○<br>LOW       |
| <b>False positives</b><br>(patients incorrectly classified as having elevated intracranial pressure)     |                              |                                                 |                                                 |              |               |                      |                  | 116 (59 to 207)                  | 82 (42 to 148)              | 49 (25 to 89)               |                   |

### Explanations

- a. The majority of the included studies were at a high risk of bias.  
 b. Confidence intervals for sensitivity and specificity are wide and do not exclude important differences.

**Supplemental Figure 3:** HSROC Curve and Forest Plot for Pupillary Dilation. Forest plot of sensitivity and specificity, the hierarchical summary receiver operating characteristic curve and bivariate summary points of (specificity, sensitivity), and their 95% confidence region (dotted line) for Pupillary Dilation to detect elevated intracranial pressure. Abbreviations: TP = true positive; FP = false positive; FN = false negative; TN = true negative; CI = confidence interval.

| Study            | TP | FP  | FN | TN  | Sensitivity (95% CI) | Specificity (95% CI) | Sensitivity (95% CI) | Specificity (95% CI) |
|------------------|----|-----|----|-----|----------------------|----------------------|----------------------|----------------------|
| Soustiel 2010    | 18 | 30  | 18 | 56  | 0.50 [0.33, 0.67]    | 0.65 [0.54, 0.75]    |                      |                      |
| Kramer 2016      | 25 | 109 | 26 | 401 | 0.49 [0.35, 0.63]    | 0.79 [0.75, 0.82]    |                      |                      |
| Pace 2018        | 9  | 8   | 10 | 19  | 0.47 [0.24, 0.71]    | 0.70 [0.50, 0.86]    |                      |                      |
| Hukkelhoven 2005 | 34 | 17  | 50 | 29  | 0.40 [0.30, 0.52]    | 0.63 [0.48, 0.77]    |                      |                      |
| Wettervik 2018   | 20 | 70  | 38 | 474 | 0.34 [0.22, 0.48]    | 0.87 [0.84, 0.90]    |                      |                      |
| Miller 1977      | 22 | 12  | 49 | 77  | 0.31 [0.21, 0.43]    | 0.87 [0.78, 0.93]    |                      |                      |
| Marshall 1983    | 4  | 1   | 9  | 1   | 0.31 [0.09, 0.61]    | 0.50 [0.01, 0.99]    |                      |                      |
| Lee 2018         | 1  | 6   | 7  | 50  | 0.13 [0.00, 0.53]    | 0.89 [0.78, 0.96]    |                      |                      |
| Narayan 1982     | 1  | 6   | 7  | 47  | 0.13 [0.00, 0.53]    | 0.89 [0.77, 0.96]    |                      |                      |
| Badri 2012       | 0  | 3   | 59 | 303 | 0.00 [0.00, 0.06]    | 0.99 [0.97, 1.00]    |                      |                      |

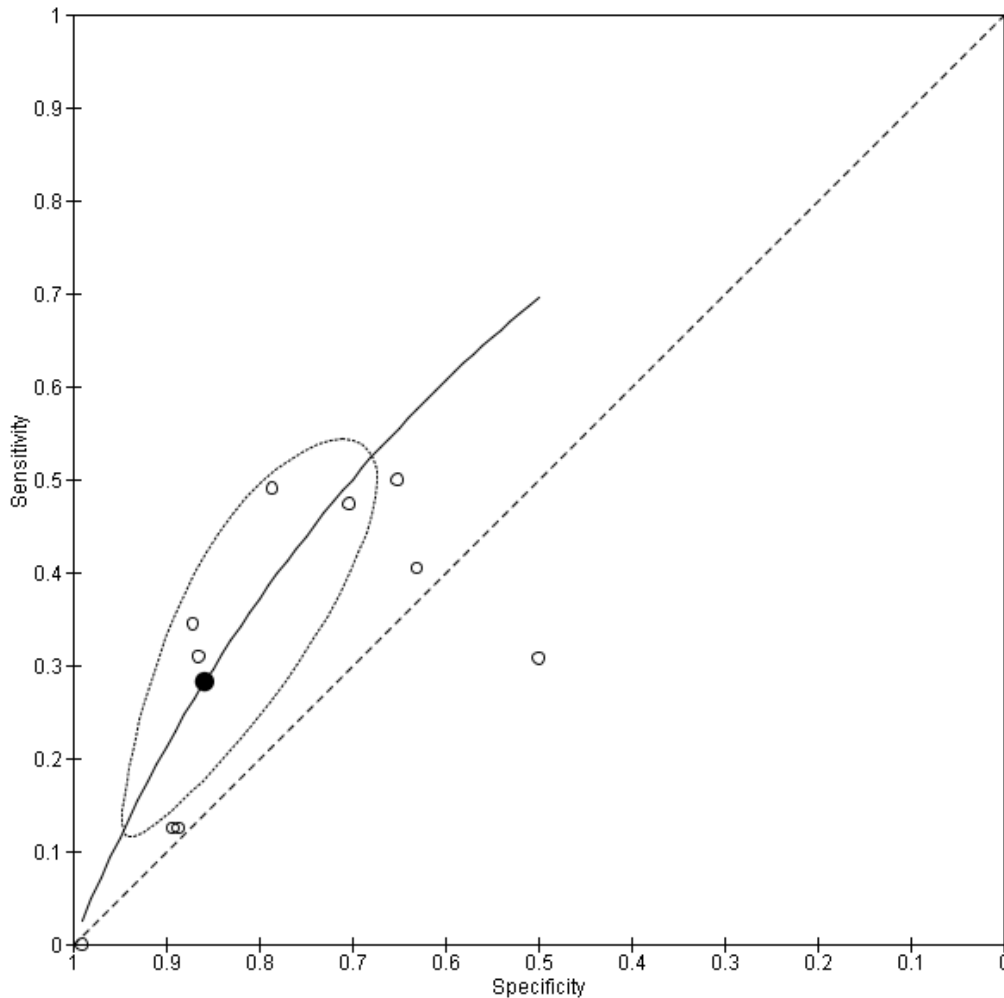



**Supplemental Figure 4:** HSROC Curve and Forest Plot for Motor Posturing. Forest plot of sensitivity and specificity, the hierarchical summary receiver operating characteristic curve and bivariate summary points of (specificity, sensitivity), and their 95% confidence region (dotted line) for motor posturing to detect elevated intracranial pressure.

Abbreviations: TP = true positive; FP = false positive; FN = false negative; TN = true negative; CI = confidence interval.

| Study            | TP | FP | FN  | TN  | Sensitivity (95% CI) | Specificity (95% CI) | Sensitivity (95% CI) | Specificity (95% CI) |
|------------------|----|----|-----|-----|----------------------|----------------------|----------------------|----------------------|
| Donovan 1998     | 6  | 4  | 1   | 1   | 0.86 [0.42, 1.00]    | 0.20 [0.01, 0.72]    |                      |                      |
| Narayan 1982     | 6  | 15 | 2   | 38  | 0.75 [0.35, 0.97]    | 0.72 [0.58, 0.83]    |                      |                      |
| Hukkelhoven 2005 | 50 | 20 | 31  | 17  | 0.62 [0.50, 0.72]    | 0.46 [0.29, 0.63]    |                      |                      |
| Miller 1977      | 43 | 31 | 28  | 58  | 0.61 [0.48, 0.72]    | 0.65 [0.54, 0.75]    |                      |                      |
| Pace 2018        | 9  | 12 | 10  | 15  | 0.47 [0.24, 0.71]    | 0.56 [0.35, 0.75]    |                      |                      |
| Heuer 2004       | 50 | 25 | 184 | 174 | 0.21 [0.16, 0.27]    | 0.87 [0.82, 0.92]    |                      |                      |

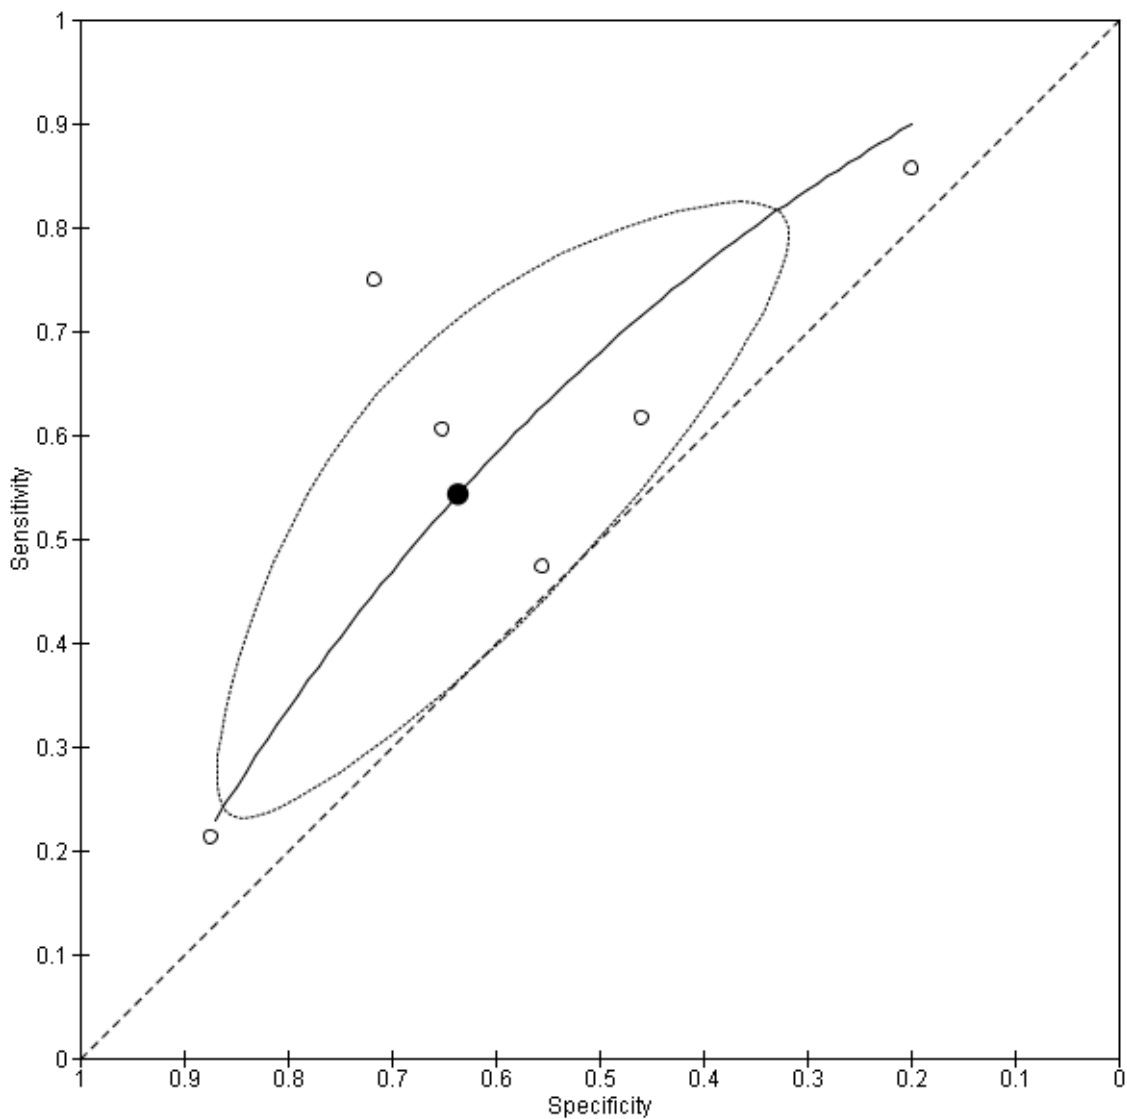

**Supplemental Figure 5:** HSROC Curve and Forest Plot for Decreased Level of Consciousness ( $GCS \leq 8$ ). Forest plot of sensitivity and specificity, the hierarchical summary receiver operating characteristic curve and bivariate summary points of (specificity, sensitivity), and their 95% confidence region (dotted line) for  $GCS \leq 8$  to detect elevated intracranial pressure. Abbreviations: TP = true positive; FP = false positive; FN = false negative; TN = true negative; CI = confidence interval.

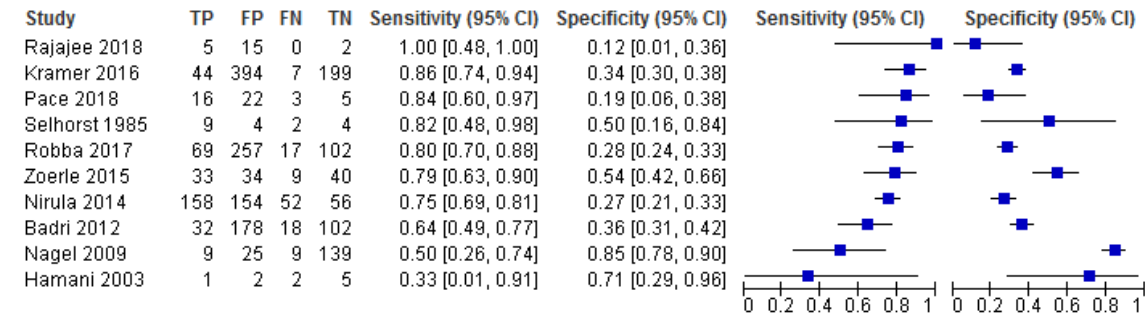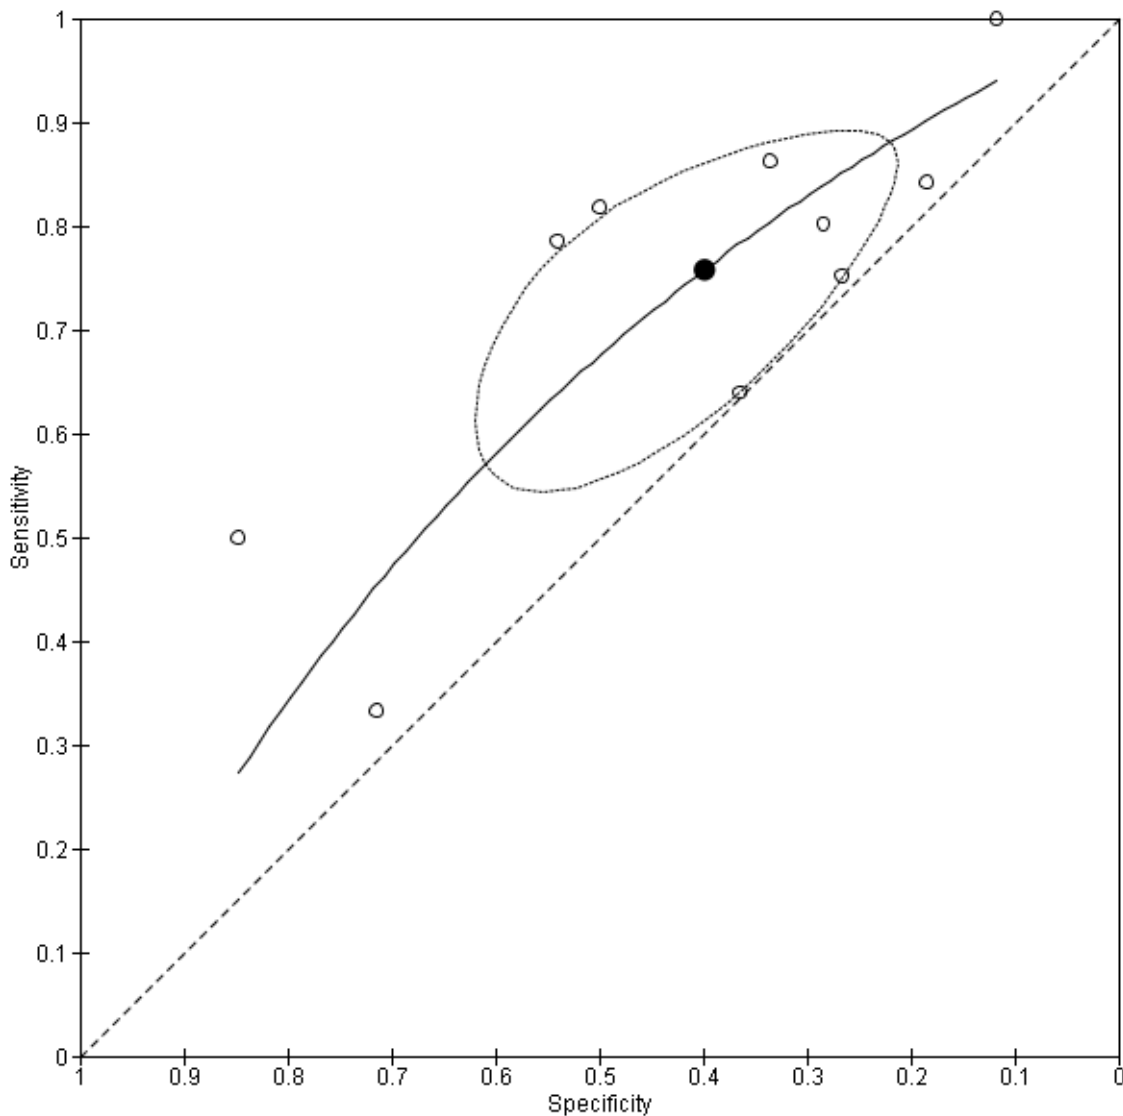

**Supplemental Figure 6:** HSROC Curve and Forest Plot for Compression or Absence of Basal Cisterns. Forest plot of sensitivity and specificity, the hierarchical summary receiver operating characteristic curve and bivariate summary points of (specificity, sensitivity), and their 95% confidence region (dotted line) for compression/absence of basal cisterns to detect elevated intracranial pressure. Abbreviations: TP = true positive; FP = false positive; FN = false negative; TN = true negative; CI = confidence interval.

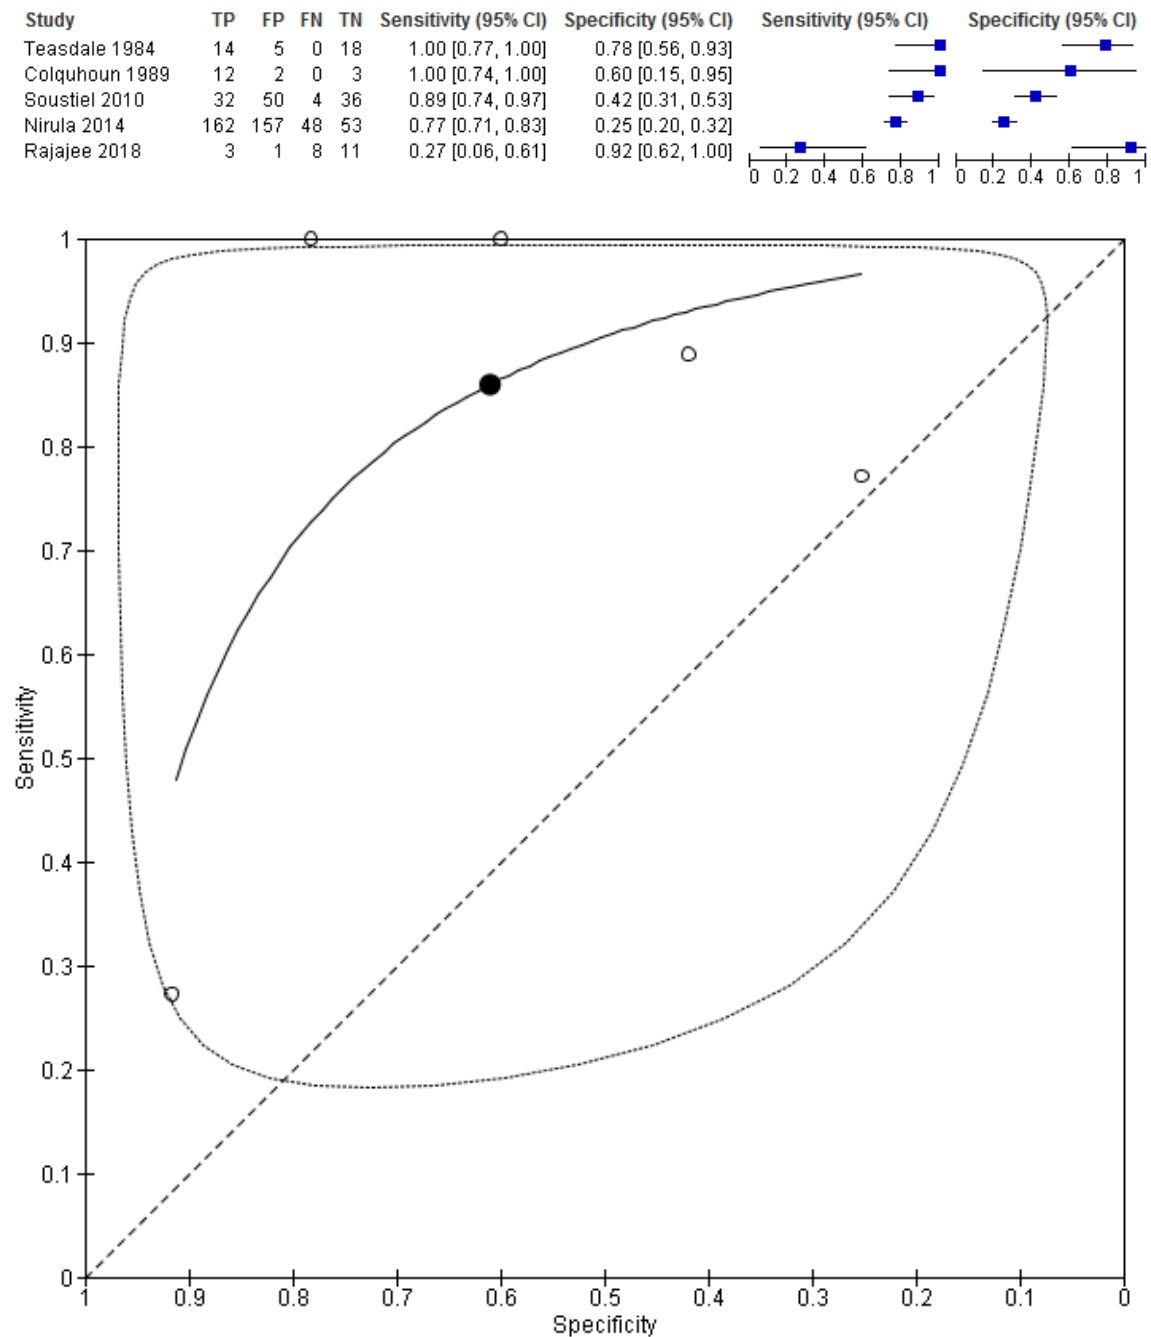

**Supplemental Figure 7:** HSROC Curve and Forest Plot for Any Midline Shift. Forest plot of sensitivity and specificity, the hierarchical summary receiver operating characteristic curve and bivariate summary points of (specificity, sensitivity), and their 95% confidence region (dotted line) for midline shift  $\geq 0$ mm to detect elevated intracranial pressure. Abbreviations: TP = true positive; FP = false positive; FN = false negative; TN = true negative; CI = confidence interval.

| Study          | TP  | FP  | FN | TN | Sensitivity (95% CI) | Specificity (95% CI) | Sensitivity (95% CI) | Specificity (95% CI) |
|----------------|-----|-----|----|----|----------------------|----------------------|----------------------|----------------------|
| Jeon 2018      | 5   | 19  | 0  | 1  | 1.00 [0.48, 1.00]    | 0.05 [0.00, 0.25]    |                      |                      |
| Galbraith 1981 | 14  | 6   | 2  | 4  | 0.88 [0.62, 0.98]    | 0.40 [0.12, 0.74]    |                      |                      |
| Nirula 2014    | 178 | 170 | 32 | 40 | 0.85 [0.79, 0.89]    | 0.19 [0.14, 0.25]    |                      |                      |
| Marshall 1983  | 11  | 1   | 2  | 1  | 0.85 [0.55, 0.98]    | 0.50 [0.01, 0.99]    |                      |                      |
| Sadhu 1979     | 6   | 14  | 2  | 11 | 0.75 [0.35, 0.97]    | 0.44 [0.24, 0.65]    |                      |                      |
| Hara 1998      | 23  | 3   | 10 | 19 | 0.70 [0.51, 0.84]    | 0.86 [0.65, 0.97]    |                      |                      |
| Tabaddor 1982  | 16  | 7   | 7  | 6  | 0.70 [0.47, 0.87]    | 0.46 [0.19, 0.75]    |                      |                      |
| Hayashi 1982   | 7   | 0   | 5  | 5  | 0.58 [0.28, 0.85]    | 1.00 [0.48, 1.00]    |                      |                      |

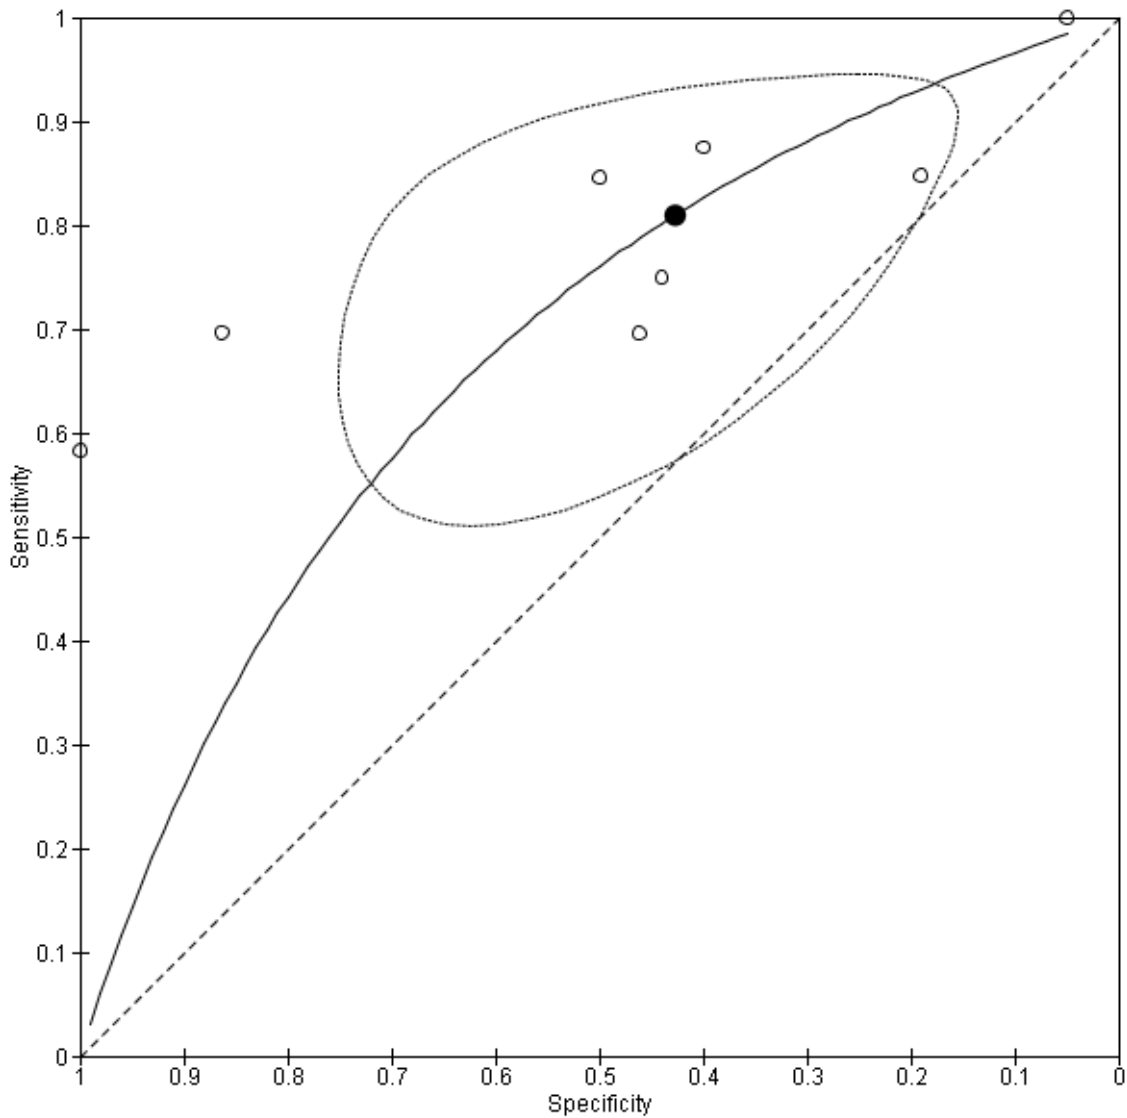

**Supplemental Figure 8:** HSROC Curve and Forest Plot for Midline Shift  $\geq 5$ mm. Forest plot of sensitivity and specificity, the hierarchical summary receiver operating characteristic curve and bivariate summary points of (specificity, sensitivity), and their 95% confidence region (dotted line) for midline shift  $\geq 5$ mm to detect elevated intracranial pressure. Abbreviations: TP = true positive; FP = false positive; FN = false negative; TN = true negative; CI = confidence interval.

| Study          | TP  | FP | FN  | TN  | Sensitivity (95% CI) | Specificity (95% CI) | Sensitivity (95% CI) | Specificity (95% CI) |
|----------------|-----|----|-----|-----|----------------------|----------------------|----------------------|----------------------|
| Jeon 2018      | 5   | 16 | 0   | 4   | 1.00 [0.48, 1.00]    | 0.20 [0.06, 0.44]    |                      |                      |
| Soustiel 2010  | 22  | 28 | 14  | 58  | 0.61 [0.43, 0.77]    | 0.67 [0.56, 0.77]    |                      |                      |
| Hara 1998      | 17  | 1  | 16  | 21  | 0.52 [0.34, 0.69]    | 0.95 [0.77, 1.00]    |                      |                      |
| Hayashi 1982   | 6   | 0  | 6   | 5   | 0.50 [0.21, 0.79]    | 1.00 [0.48, 1.00]    |                      |                      |
| Galbraith 1981 | 8   | 3  | 8   | 7   | 0.50 [0.25, 0.75]    | 0.70 [0.35, 0.93]    |                      |                      |
| Nirula 2014    | 100 | 95 | 110 | 115 | 0.48 [0.41, 0.55]    | 0.55 [0.48, 0.62]    |                      |                      |
| Marshall 1983  | 6   | 1  | 7   | 1   | 0.46 [0.19, 0.75]    | 0.50 [0.01, 0.99]    |                      |                      |
| Zoerle 2015    | 12  | 12 | 30  | 62  | 0.29 [0.16, 0.45]    | 0.84 [0.73, 0.91]    |                      |                      |
| Tabaddor 1982  | 6   | 3  | 17  | 10  | 0.26 [0.10, 0.48]    | 0.77 [0.46, 0.95]    |                      |                      |

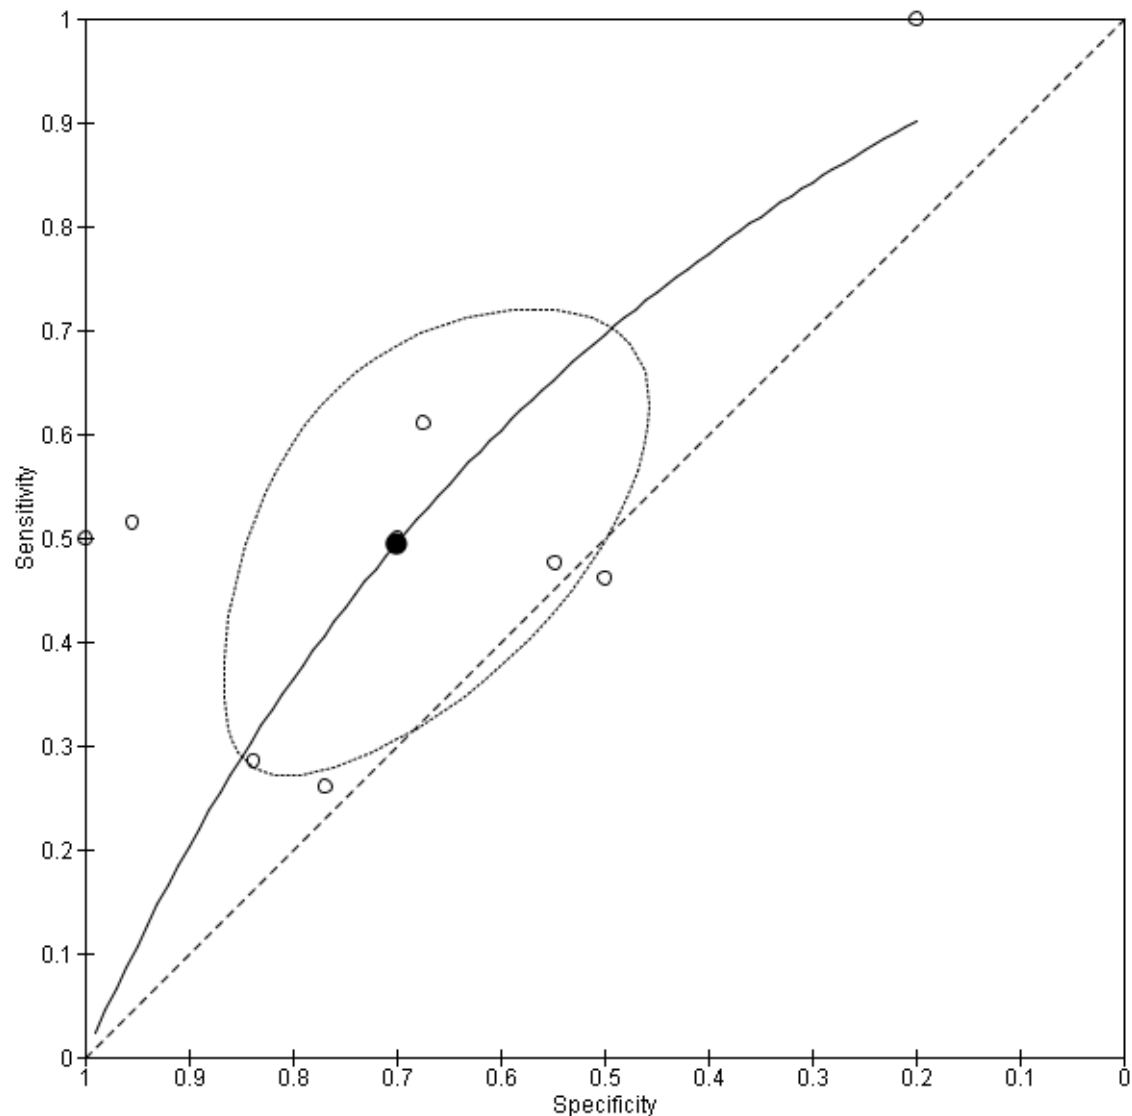

**Supplemental Figure 9:** HSROC Curve and Forest Plot for Midline Shift  $\geq 10$ mm. Forest plot of sensitivity and specificity, the hierarchical summary receiver operating characteristic curve and bivariate summary points of (specificity, sensitivity), and their 95% confidence region (dotted line) for midline shift  $\geq 10$ mm to detect elevated intracranial pressure. Abbreviations: TP = true positive; FP = false positive; FN = false negative; TN = true negative; CI = confidence interval.

| Study          | TP | FP | FN  | TN  | Sensitivity (95% CI) | Specificity (95% CI) | Sensitivity (95% CI) | Specificity (95% CI) |
|----------------|----|----|-----|-----|----------------------|----------------------|----------------------|----------------------|
| Jeon 2018      | 4  | 3  | 1   | 17  | 0.80 [0.28, 0.99]    | 0.85 [0.62, 0.97]    |                      |                      |
| Kamel 2012     | 13 | 4  | 27  | 13  | 0.33 [0.19, 0.49]    | 0.76 [0.50, 0.93]    |                      |                      |
| Hara 1998      | 9  | 0  | 24  | 22  | 0.27 [0.13, 0.46]    | 1.00 [0.85, 1.00]    |                      |                      |
| Nirula 2014    | 46 | 39 | 164 | 171 | 0.22 [0.17, 0.28]    | 0.81 [0.75, 0.86]    |                      |                      |
| Marshall 1983  | 2  | 0  | 11  | 2   | 0.15 [0.02, 0.45]    | 1.00 [0.16, 1.00]    |                      |                      |
| Galbraith 1981 | 2  | 0  | 14  | 10  | 0.13 [0.02, 0.38]    | 1.00 [0.69, 1.00]    |                      |                      |
| Tabaddor 1982  | 2  | 1  | 21  | 12  | 0.09 [0.01, 0.28]    | 0.92 [0.64, 1.00]    |                      |                      |
| Hayashi 1982   | 1  | 0  | 11  | 5   | 0.08 [0.00, 0.38]    | 1.00 [0.48, 1.00]    |                      |                      |

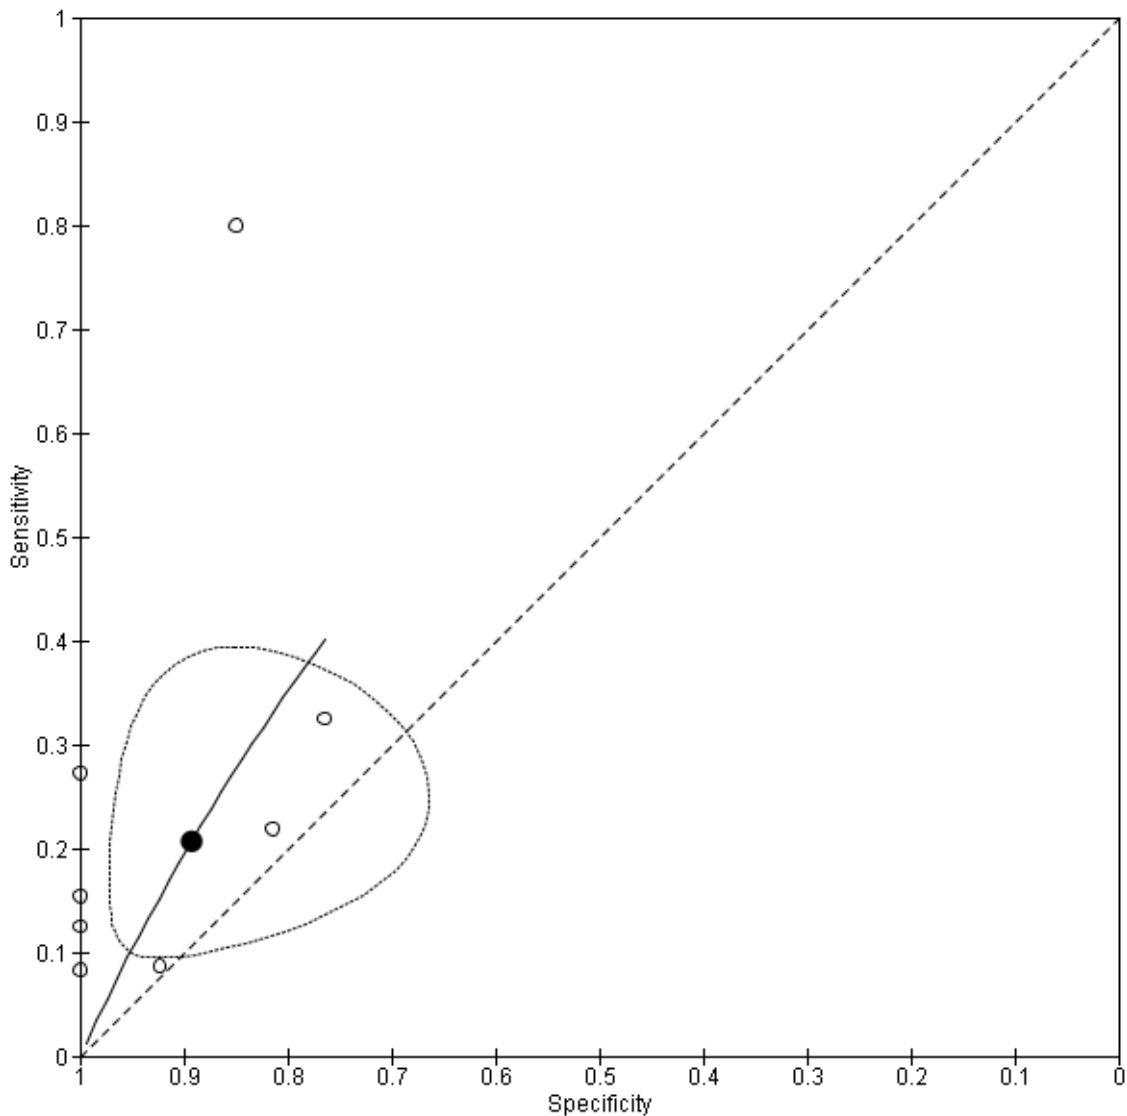

**Supplemental Figure 10:** HSROC Curve and Forest Plot for Marshall Score  $\geq 3$ . Forest plot of sensitivity and specificity, the hierarchical summary receiver operating characteristic curve and bivariate summary points of (specificity, sensitivity), and their 95% confidence region (dotted line) for Marshall Score  $\geq 3$  to detect elevated intracranial pressure. Abbreviations: TP = true positive; FP = false positive; FN = false negative; TN = true negative; CI = confidence interval.

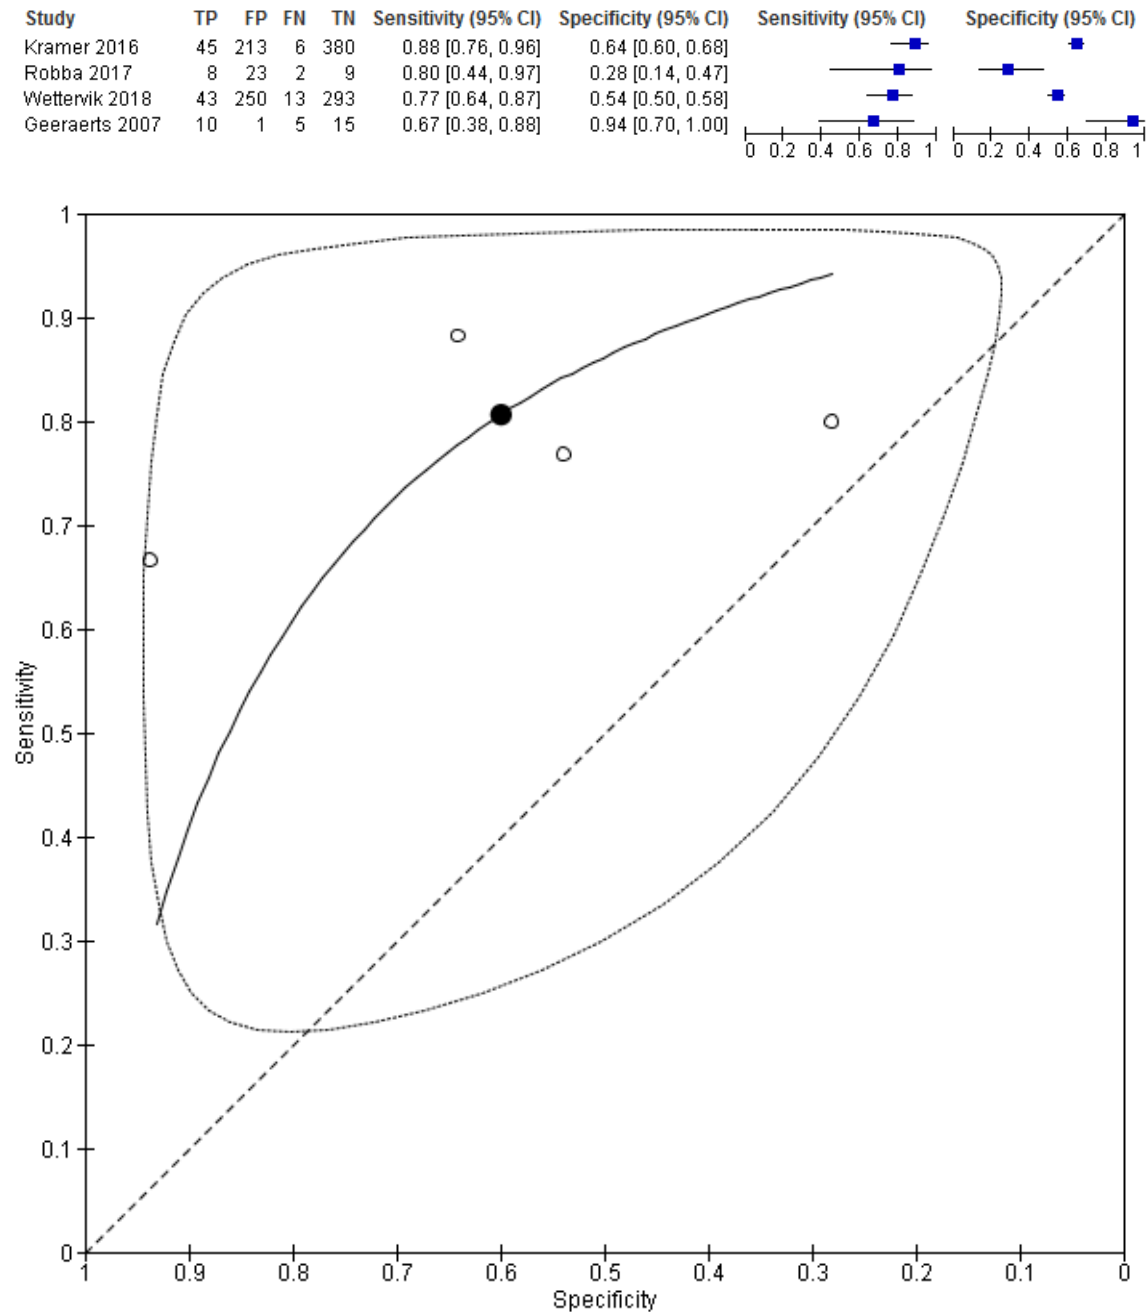

**Supplemental Figure 11:** HSROC Curve and Forest Plot for Marshall Score  $\geq 4$ . Forest plot of sensitivity and specificity, the hierarchical summary receiver operating characteristic curve and bivariate summary points of (specificity, sensitivity), and their 95% confidence region (dotted line) for Marshall Score  $\geq 4$  to detect elevated intracranial pressure. Abbreviations: TP = true positive; FP = false positive; FN = false negative; TN = true negative; CI = confidence interval.

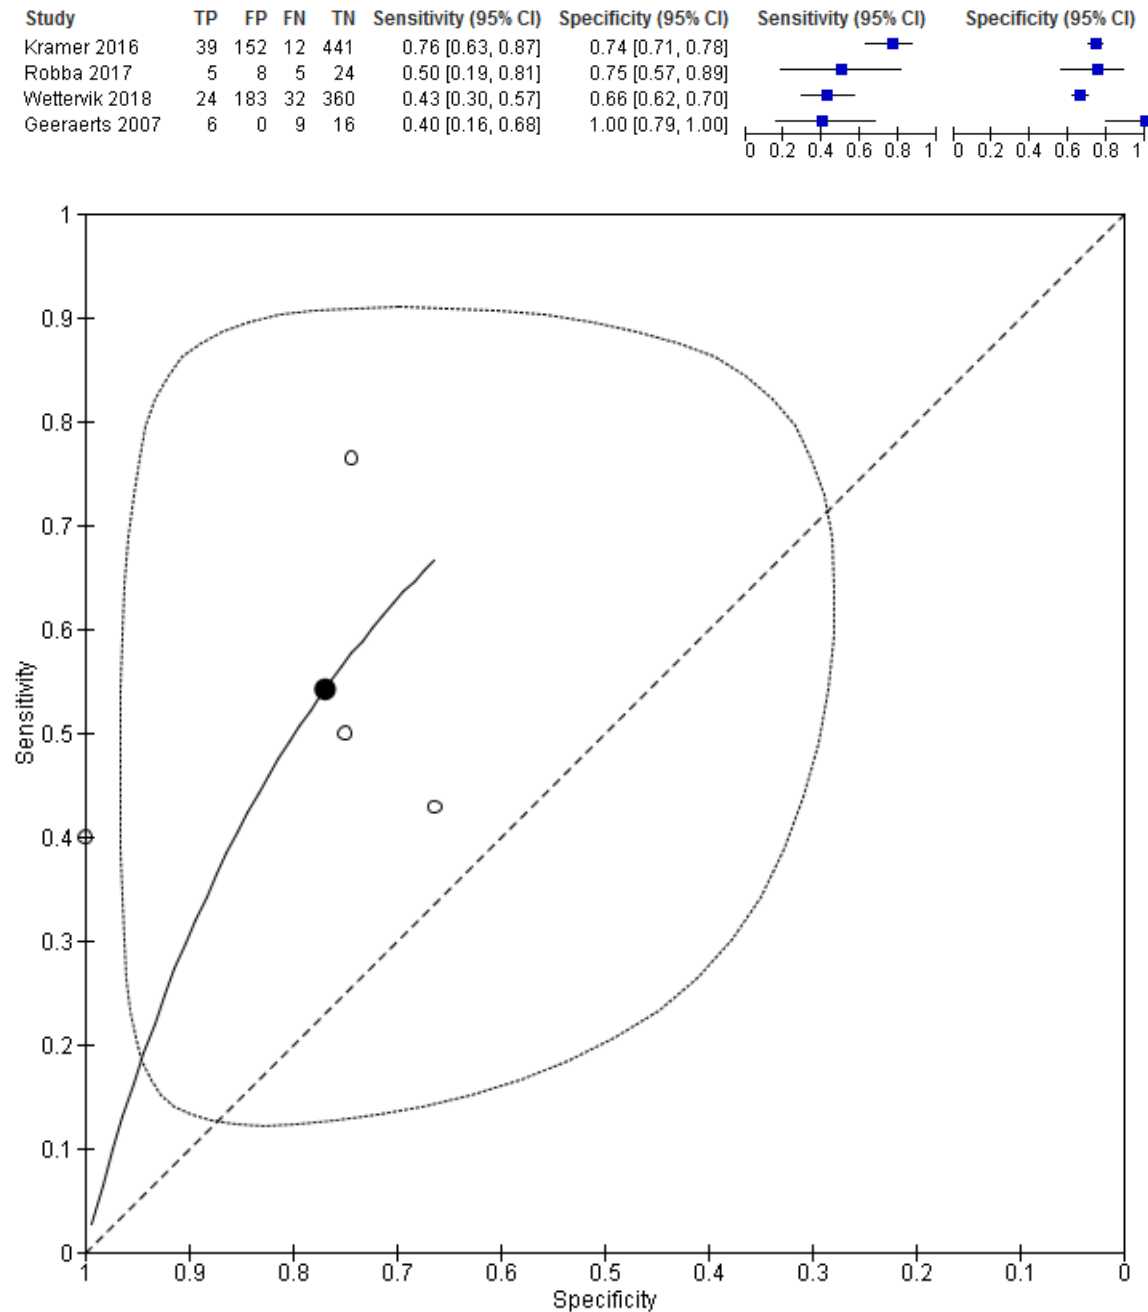



**Supplemental Figure 12:** HSROC Curve and Forest Plot for Marshall Score  $\geq 5$ . Forest plot of sensitivity and specificity, the hierarchical summary receiver operating characteristic curve and bivariate summary points of (specificity, sensitivity), and their 95% confidence region (dotted line) for Marshall Score  $\geq 5$  to detect elevated intracranial pressure. Abbreviations: TP = true positive; FP = false positive; FN = false negative; TN = true negative; CI = confidence interval.

| Study          | TP | FP  | FN | TN  | Sensitivity (95% CI) | Specificity (95% CI) | Sensitivity (95% CI) | Specificity (95% CI) |
|----------------|----|-----|----|-----|----------------------|----------------------|----------------------|----------------------|
| Kramer 2016    | 34 | 118 | 17 | 475 | 0.67 [0.52, 0.79]    | 0.80 [0.77, 0.83]    |                      |                      |
| Geeraerts 2007 | 6  | 0   | 9  | 16  | 0.40 [0.16, 0.68]    | 1.00 [0.79, 1.00]    |                      |                      |
| Wettervik 2018 | 21 | 159 | 35 | 384 | 0.38 [0.25, 0.51]    | 0.71 [0.67, 0.75]    |                      |                      |
| Robba 2017     | 3  | 3   | 7  | 29  | 0.30 [0.07, 0.65]    | 0.91 [0.75, 0.98]    |                      |                      |

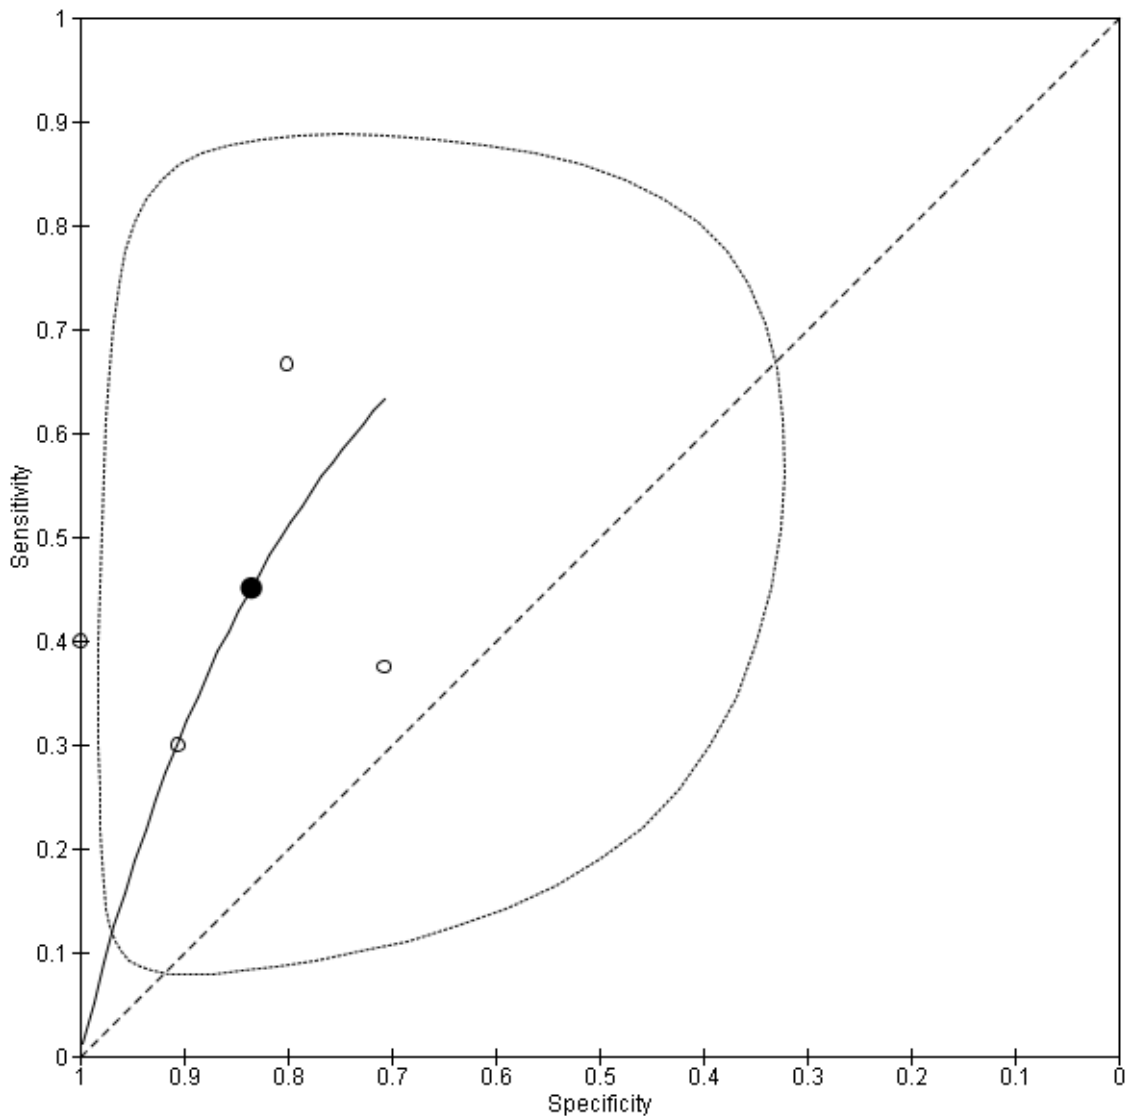

**Supplemental Figure 13:** ROC Curves for Marshall Criteria By Study.

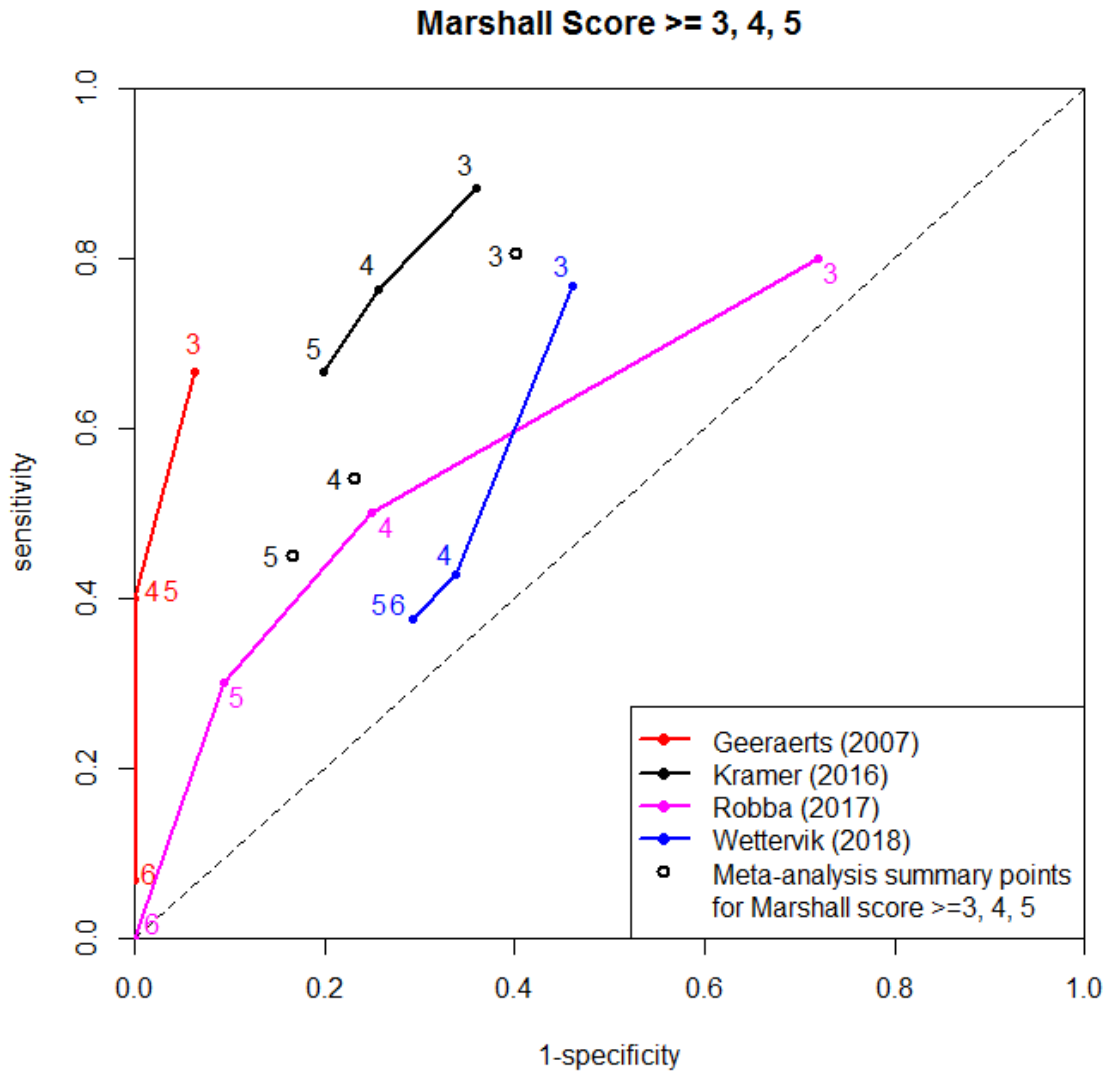

**Supplemental Table 13:** Diagnostic Performance of Optic Nerve Sheath Diameter. Individual studies with the AUROC of ONSD, the thresholds utilized, and associated sensitivity and specificity. Abbreviations: AUROC = Area under the receiver operating characteristics curve; CI = Confidence Interval; ICP = Intracranial pressure; ONSD = Optic Nerve Sheath Diameter; opt = reported optimal cut-off.

| Study            | Patients with ICP $\geq$ 20 / Total Patients | ONSD cutoff mm (optimal)       | Sensitivity (95% CI)                                 | Specificity (95% CI)                                   | AUROC (95% CI)       |
|------------------|----------------------------------------------|--------------------------------|------------------------------------------------------|--------------------------------------------------------|----------------------|
| Soliman (2018)   | 177 / 200                                    | 6.4 (opt)                      | 85.3                                                 | 82.6                                                   | 0.88 (0.80-0.95)*    |
| Jeon (2017)      | 32 / 62                                      | 5.6 (opt)                      | 93.75 (79.2-99.2)                                    | 86.67 (69.3-96.2)                                      | 0.936 (0.844-0.983)* |
| Lee (2018)       | 8 / 64                                       | 5.3 (opt)                      | 88                                                   | 79                                                     | 0.834                |
| Robba (2017)     | 86 / 445                                     | 5.85 (opt)                     | 86.6                                                 | 82.6                                                   | 0.91 (0.88-0.95)*    |
| Frumin (2014)    | 6 / 26                                       | 5.2 (opt)                      | 83.3 (35.9-99.6)                                     | 100.0 (84.6-100)                                       | 0.865 (0.66-0.96)    |
| Raffiz (2012)    | NA / 41                                      | 4.94<br>5.205 (opt)            | 100<br>95.8                                          | 54.9<br>80.4                                           | 0.964 (0.921-1.000)* |
| Rajajee (2011)   | 26 / 65                                      | 4.8 (opt)<br>5.0<br>5.2<br>5.9 | 96 (91-99)<br>86 (79-92)<br>67 (58-35)<br>19 (13-27) | 94 (92-96)<br>98 (96-99)<br>98 (97-99)<br>100 (99-100) | 0.98 (0.96-0.99)     |
| Moretti (2009)   | 29 / 94                                      | 5.2 (opt)                      | 93.1 (77.2-99.0)                                     | 73.85 (61.5-84.0)                                      | 0.925 (0.852-0.969)* |
| Soldatos (2008)  | 27 / 32                                      | 5.7 (opt)                      | 74.1                                                 | 100                                                    | 0.93 (0.79-0.99)*    |
| Geeraerts (2007) | 15 / 31                                      | 5.9 (opt)                      | 87                                                   | 94                                                     | 0.96 (0.83-0.99)     |
| Kimberly (2007)  | 8 / 38                                       | 4.5<br>5.0 (opt)               | 100<br>88 (47-99)                                    | 63<br>93 (78-99)                                       | 0.93 (0.84-0.99)*    |

\*: Reported upper limit of 95% CI not symmetric with the lower limit in the original or logit scale. Therefore, we only used the AUROCs with their lower confidence limits, and assumed symmetry in logit scale for the meta-analysis of AUROC.

**Supplemental Figure 14:** Diagnostic Performance of Optic Nerve Sheath Diameter with Thresholds displayed. The ONSD thresholds utilized associated with the pairs of sensitivity and specificity were displayed on the Receiver Operating Characteristics plane.

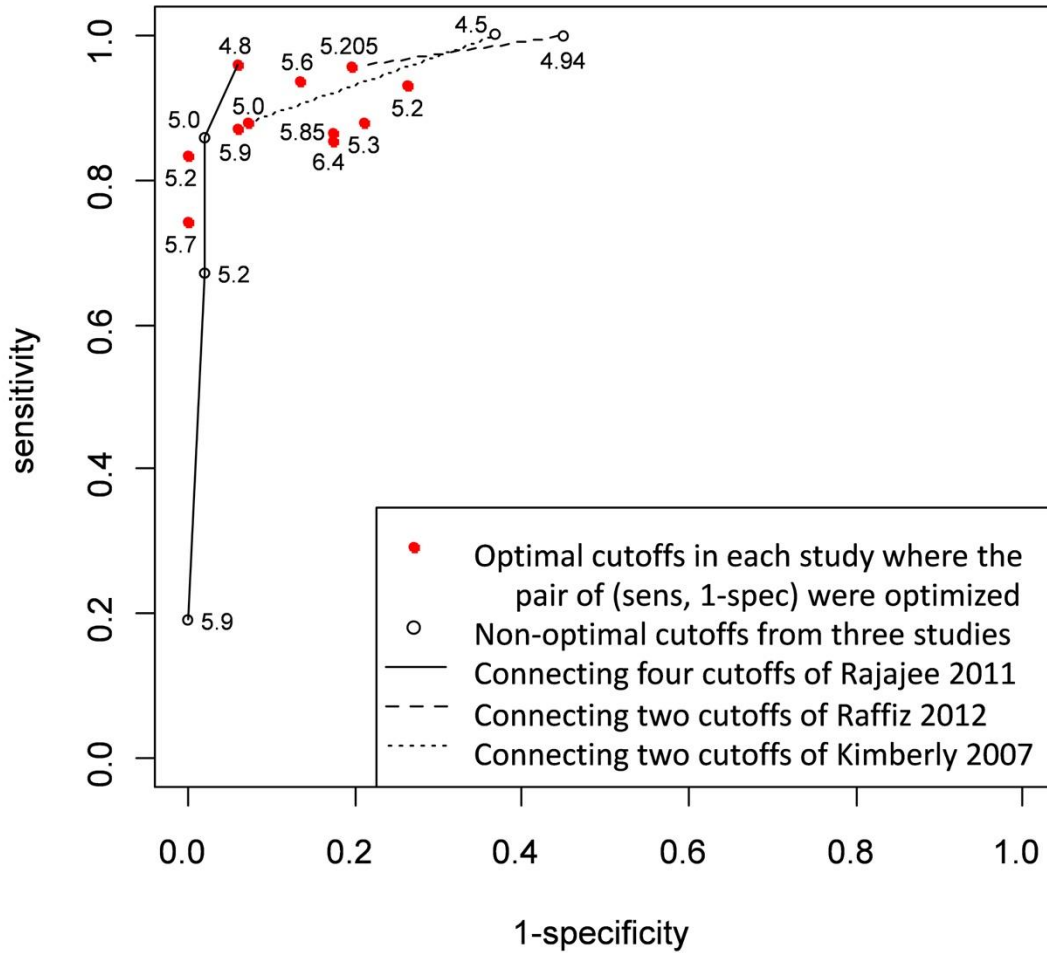

**Supplemental Figure 15:** TCD-ABP Methods for Detection of Elevated Intracranial Pressure. Pooled area under the ROC curve (AUROC) for transcranial doppler arterial blood pressure (TCD-ABP) methods to detect of intracranial pressure (ICP)  $\geq 20$  mmHg across studies.

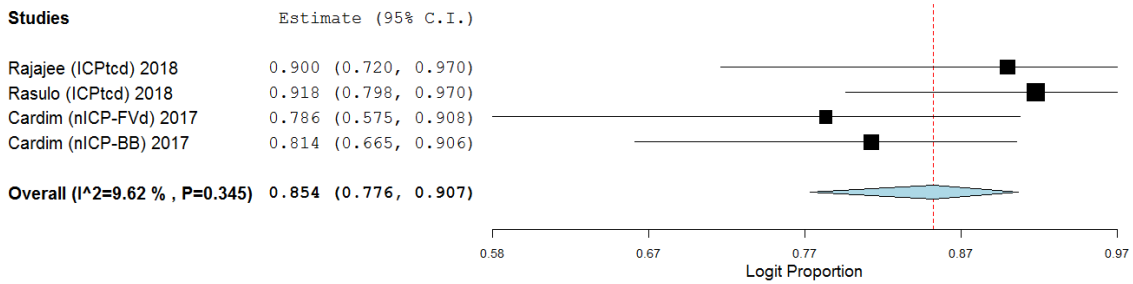

Note: Reported upper limit of 95% CI not symmetric with the lower limit in the original or logit scale. Therefore, we only used the AUROCs with their lower confidence limits and assumed symmetry in logit scale for the meta-analysis of AUROC.

**Supplemental Table 14:** Descriptive Table of TCD-ABP Methods for Detection of Elevated Intracranial Pressure. Pooled area under the ROC curve (AUROC) for transcranial doppler arterial blood pressure (TCD-ABP) methods to detect of intracranial pressure (ICP)  $\geq 20$  mmHg across studies. Abbreviations: AUROC = Area under the Receiver Operating Characteristics curve; CI = Confidence Interval; ICP = Intracranial Pressure; NR = not reported.

| Study                   | Patients with ICP $\geq 20$ / Total Patients | cutoff (mmHg) | Sensitivity (95% CI) | Specificity (95% CI) | Reported AUROC (95% CI) |
|-------------------------|----------------------------------------------|---------------|----------------------|----------------------|-------------------------|
| Rajajee (2018): ICPTcd  | 5 / 21                                       | > 18.55       | 100 (48-100)         | 81 (58-95)           | 0.90 (0.72-0.98) *      |
| Rasulo (2018): ICPTcd   | 18 / 38 §                                    | NR §          | NR §                 | NR §                 | 0.918 (0.799-1.000) *§  |
| Cardim (2017): nICP_FVd | 28 / 37                                      | NR            | NR                   | NR                   | 0.786 (0.575-0.996) *#  |
| Cardim (2017): nICP_BB  | 28 / 37                                      | NR            | NR                   | NR                   | 0.814 (0.665-0.962) *#  |

\*: Reported upper limit of 95% CI not symmetric with the lower limit in the original or logit scale. Therefore, we only used the AUROCs with their lower confidence limits and assumed symmetry in logit scale for the meta-analysis of AUROC.

§: For Rasulo (2018), we only used the reported AUROC at the first ICPTcd measurement (TIME 1) performed immediately before ICPI placement.

#: Cardim (2017) reported AUROC of 0.77 (0.65-0.88) and 0.82 (0.71-0.93) for nICP\_FVd and nICP\_BB to detect ICP >35 mmHg. We calculated the AUROC for detection of ICP  $\geq 20$  mmHg based on individual level data.

**Supplemental Table 15:** Sensitivity Analyses – Summary Estimates for Physical Examination and Imaging after Removal of Studies with Potential High Risk-of-Bias. Abbreviations: GCS = Glasgow Coma Scale

|                                                    | <b>No. of Patients<br/>(No. of Cohorts)</b> | <b>Sensitivity</b>       | <b>Specificity</b>       | <b>Diagnostic Odds<br/>Ratio (DOR)</b> | <b>Positive Likelihood<br/>Ratio (LR+)</b> | <b>Negative Likelihood<br/>Ratio (LR-)</b> |
|----------------------------------------------------|---------------------------------------------|--------------------------|--------------------------|----------------------------------------|--------------------------------------------|--------------------------------------------|
| <b>GCS ≤ 8</b>                                     | 1170<br>(8)                                 | 74.9%<br>(57.1 to 86.9%) | 43.0%<br>(26.3 to 61.5%) | 2.24<br>(1.27 to 3.97)                 | 1.31<br>(1.05 to 1.64)                     | 0.59<br>(0.39 to 0.88)                     |
| <b>Motor<br/>Posturing</b>                         | 830<br>(6)                                  | 54.3%<br>(36.6 to 71.0%) | 63.6%<br>(46.5 to 77.8%) | 2.08<br>(1.40 to 3.09)                 | 1.49<br>(1.17 to 1.90)                     | 0.72<br>(0.57 to 0.90)                     |
| <b>Any Pupillary<br/>Dilation</b>                  | 948<br>(7)                                  | 21.6%<br>(8.3 to 45.6%)  | 86.2%<br>(69.8 to 94.4%) | 1.73<br>(1.00 to 2.97)                 | 1.57<br>(1.01 to 2.43)                     | 0.91<br>(0.79 to 1.04)                     |
| <b>Basal Cisterns<br/>Absent or<br/>Compressed</b> | 199<br>(4)                                  | 87.9%<br>(53.9 to 97.8%) | 72.3%<br>(34.4 to 92.9%) | 19.08<br>(3.04 to 119.94)              | 3.18<br>(1.08 to 9.40)                     | 0.17<br>(0.04 to 0.73)                     |
| <b>Midline Shift<br/>≥ 0 mm</b>                    | 175<br>(5)                                  | 85.2%<br>(62.6 to 95.2%) | 42.2%<br>(19.3 to 69.1%) | 4.21<br>(1.65 to 10.77)                | 1.48<br>(1.02 to 2.14)                     | 0.35<br>(0.16 to 0.76)                     |
| <b>Midline Shift<br/>≥ 5 mm</b>                    | 380<br>(6)                                  | 54.4%<br>(30.8 to 76.2%) | 71.8%<br>(51.1 to 86.1%) | 3.03<br>(1.77 to 5.21)                 | 1.93<br>(1.35 to 2.75)                     | 0.64<br>(0.45 to 0.91)                     |
| <b>Midline Shift<br/>≥ 10 mm</b>                   | 199<br>(5)                                  | 25.0%<br>(12.8 to 43.1%) | 92.5%<br>(80.3 to 97.4%) | 4.09<br>(1.34 to 12.50)                | 3.32<br>(1.23 to 8.91)                     | 0.81<br>(0.67 to 0.98)                     |

**Supplemental Figure 16:** Sensitivity Analysis for Pupillary Dilation after Removal of Studies with Potential High Risk-of-Bias. Forest plot of sensitivity and specificity, the hierarchical summary receiver operating characteristic curve and bivariate summary points of (specificity, sensitivity), and their 95% confidence region (dotted line) for Pupillary Dilation to detect elevated intracranial pressure. Abbreviations: TP = true positive; FP = false positive; FN = false negative; TN = true negative; CI = confidence interval.

| Study            | TP | FP | FN | TN  | Sensitivity (95% CI) | Specificity (95% CI) | Sensitivity (95% CI) | Specificity (95% CI) |
|------------------|----|----|----|-----|----------------------|----------------------|----------------------|----------------------|
| Soustiel 2010    | 18 | 30 | 18 | 56  | 0.50 [0.33, 0.67]    | 0.65 [0.54, 0.75]    |                      |                      |
| Pace 2018        | 9  | 8  | 10 | 19  | 0.47 [0.24, 0.71]    | 0.70 [0.50, 0.86]    |                      |                      |
| Hukkelhoven 2005 | 34 | 17 | 50 | 29  | 0.40 [0.30, 0.52]    | 0.63 [0.48, 0.77]    |                      |                      |
| Miller 1977      | 22 | 12 | 49 | 77  | 0.31 [0.21, 0.43]    | 0.87 [0.78, 0.93]    |                      |                      |
| Narayan 1982     | 1  | 6  | 7  | 47  | 0.13 [0.00, 0.53]    | 0.89 [0.77, 0.96]    |                      |                      |
| Lee 2018         | 1  | 6  | 7  | 50  | 0.13 [0.00, 0.53]    | 0.89 [0.78, 0.96]    |                      |                      |
| Badri 2012       | 0  | 3  | 59 | 303 | 0.00 [0.00, 0.06]    | 0.99 [0.97, 1.00]    |                      |                      |

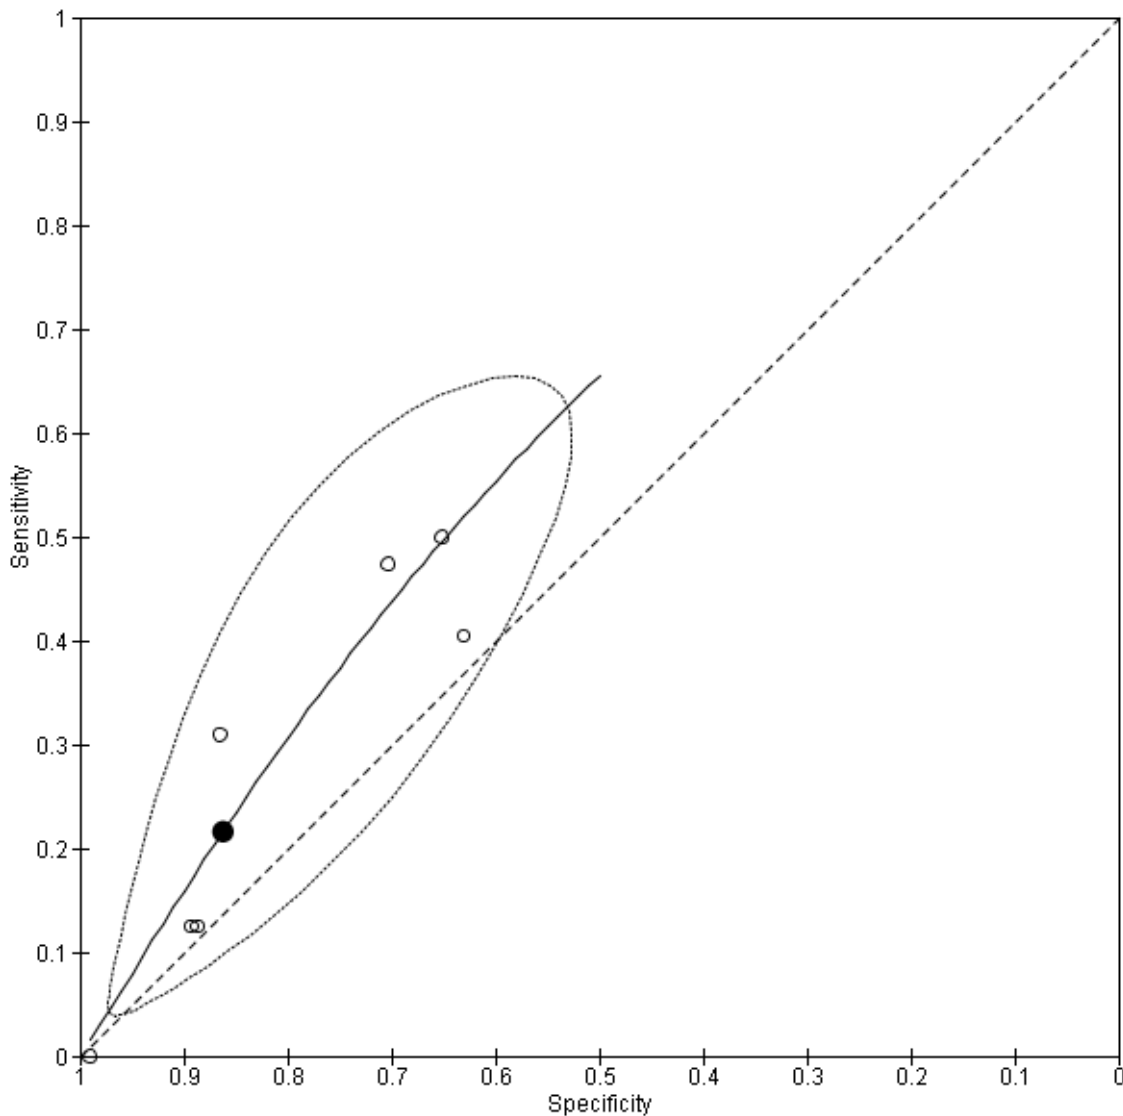



**Supplemental Figure 17:** Sensitivity Analysis for Motor Posturing after Removal of Studies with Potential High Risk-of-Bias. Forest plot of sensitivity and specificity, the hierarchical summary receiver operating characteristic curve and bivariate summary points of (specificity, sensitivity), and their 95% confidence region (dotted line) for motor posturing to detect elevated intracranial pressure. Abbreviations: TP = true positive; FP = false positive; FN = false negative; TN = true negative; CI = confidence interval.

| Study            | TP | FP | FN  | TN  | Sensitivity (95% CI) | Specificity (95% CI) | Sensitivity (95% CI) | Specificity (95% CI) |
|------------------|----|----|-----|-----|----------------------|----------------------|----------------------|----------------------|
| Donovan 1998     | 6  | 4  | 1   | 1   | 0.86 [0.42, 1.00]    | 0.20 [0.01, 0.72]    |                      |                      |
| Narayan 1982     | 6  | 15 | 2   | 38  | 0.75 [0.35, 0.97]    | 0.72 [0.58, 0.83]    |                      |                      |
| Hukkelhoven 2005 | 50 | 20 | 31  | 17  | 0.62 [0.50, 0.72]    | 0.46 [0.29, 0.63]    |                      |                      |
| Miller 1977      | 43 | 31 | 28  | 58  | 0.61 [0.48, 0.72]    | 0.65 [0.54, 0.75]    |                      |                      |
| Pace 2018        | 9  | 12 | 10  | 15  | 0.47 [0.24, 0.71]    | 0.56 [0.35, 0.75]    |                      |                      |
| Heuer 2004       | 50 | 25 | 184 | 174 | 0.21 [0.16, 0.27]    | 0.87 [0.82, 0.92]    |                      |                      |

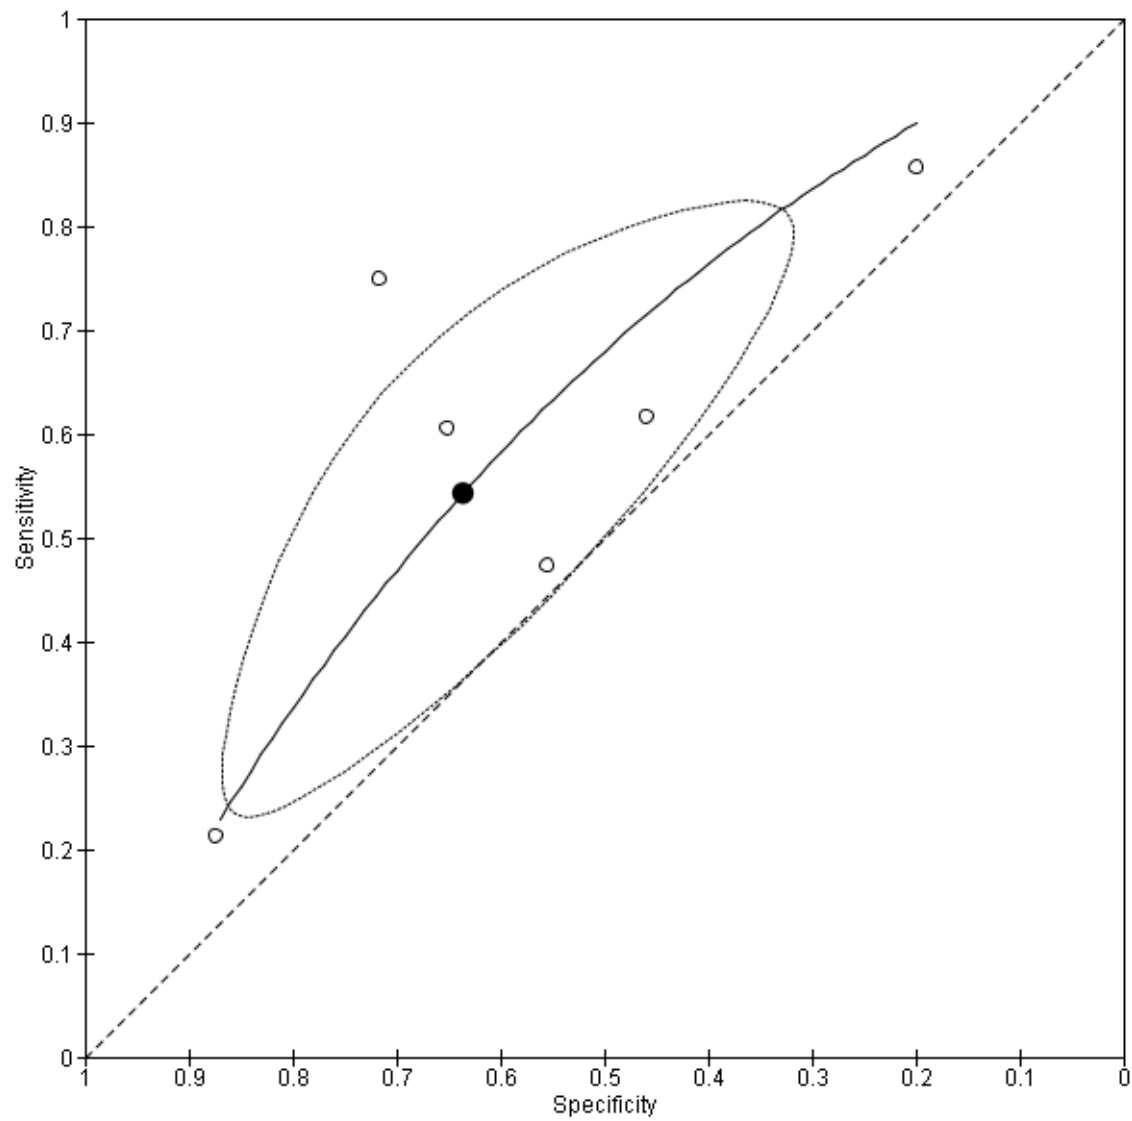

**Supplemental Figure 18:** Sensitivity Analysis for Decreased Level of Consciousness after Removal of Studies with Potential High Risk-of-Bias. Forest plot of sensitivity and specificity, the hierarchical summary receiver operating characteristic curve and bivariate summary points of (specificity, sensitivity), and their 95% confidence region (dotted line) for  $GCS \leq 8$  to detect elevated intracranial pressure. Abbreviations: TP = true positive; FP = false positive; FN = false negative; TN = true negative; CI = confidence interval.

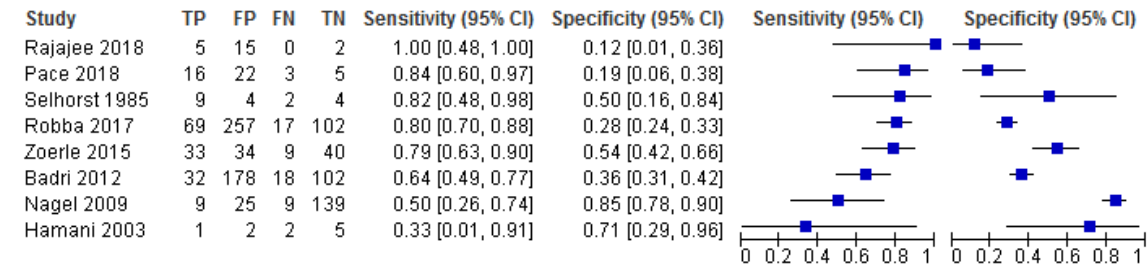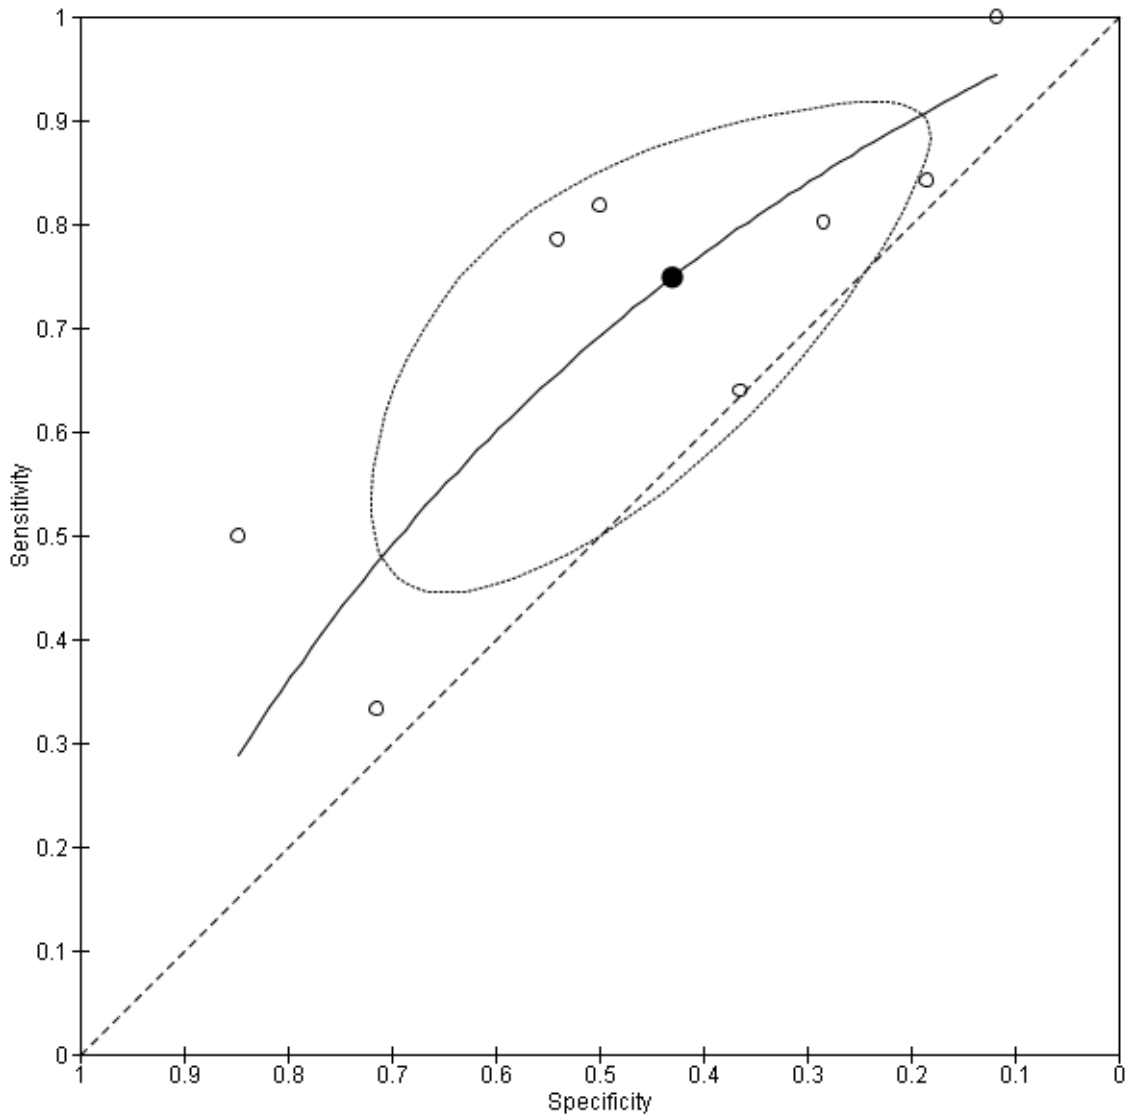

**Supplemental Figure 19:** Sensitivity Analysis for Compression or Absence of Basal Cisterns after Removal of Studies with Potential High Risk-of-Bias. Forest plot of sensitivity and specificity, the hierarchical summary receiver operating characteristic curve and bivariate summary points of (specificity, sensitivity), and their 95% confidence region (dotted line), and 95% prediction region (dashed line) for compression/absence of basal cisterns to detect elevated intracranial pressure. Abbreviations: TP = true positive; FP = false positive; FN = false negative; TN = true negative; CI = confidence interval.

| Study          | TP | FP | FN | TN | Sensitivity (95% CI) | Specificity (95% CI) | Sensitivity (95% CI) | Specificity (95% CI) |
|----------------|----|----|----|----|----------------------|----------------------|----------------------|----------------------|
| Teasdale 1984  | 14 | 5  | 0  | 18 | 1.00 [0.77, 1.00]    | 0.78 [0.56, 0.93]    |                      |                      |
| Colquhoun 1989 | 12 | 2  | 0  | 3  | 1.00 [0.74, 1.00]    | 0.60 [0.15, 0.95]    |                      |                      |
| Soustiel 2010  | 32 | 50 | 4  | 36 | 0.89 [0.74, 0.97]    | 0.42 [0.31, 0.53]    |                      |                      |
| Rajajee 2018   | 3  | 1  | 8  | 11 | 0.27 [0.06, 0.61]    | 0.92 [0.62, 1.00]    |                      |                      |

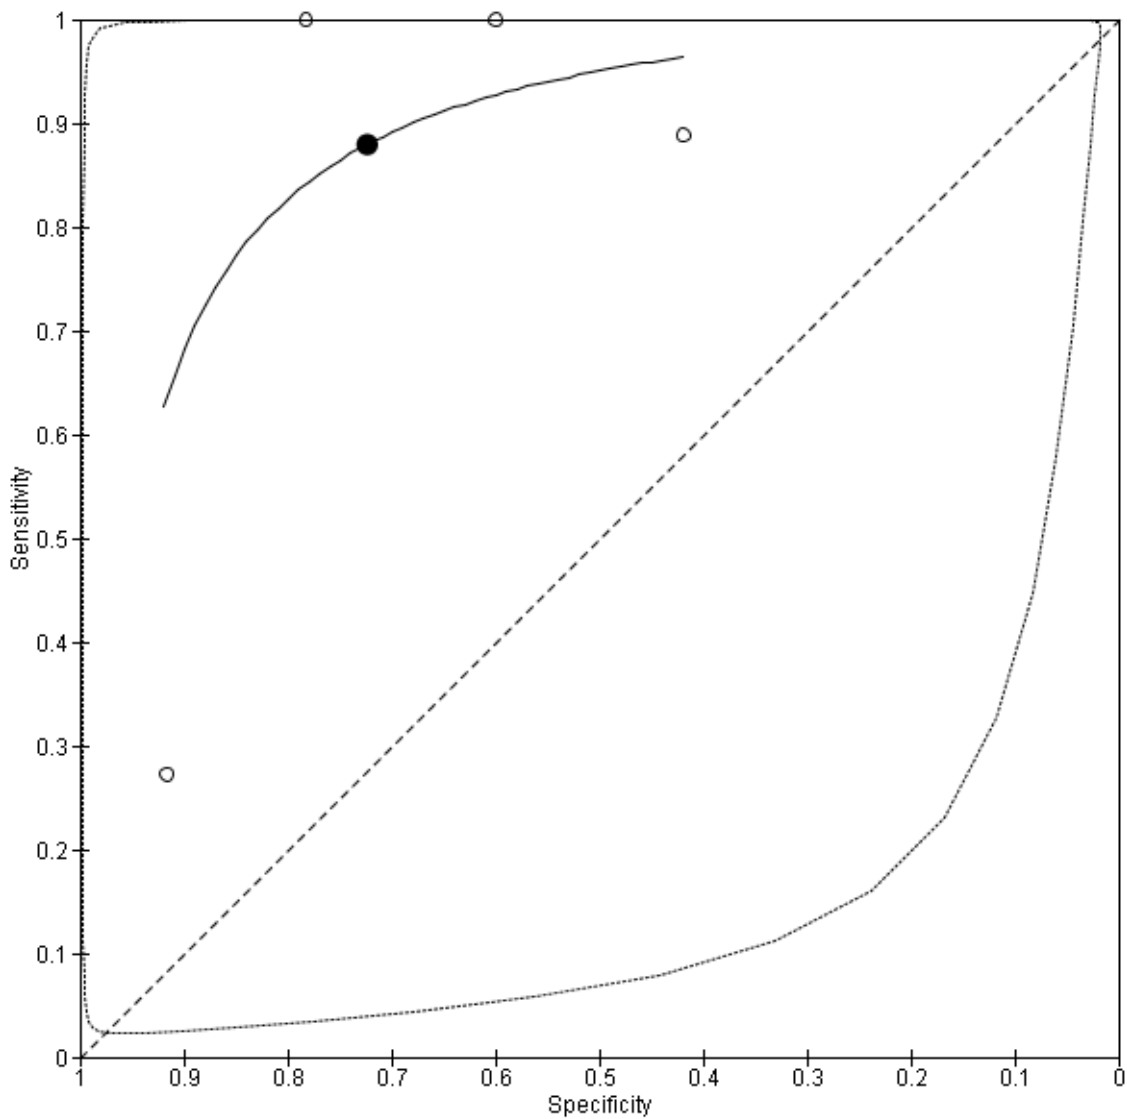

**Supplemental Figure 20:** Sensitivity Analysis for Any Midline Shift after Removal of Studies with Potential High Risk-of-Bias. Forest plot of sensitivity and specificity, the hierarchical summary receiver operating characteristic curve and bivariate summary points of (specificity, sensitivity), and their 95% confidence region (dotted line) for midline shift  $\geq 0$ mm to detect elevated intracranial pressure. Abbreviations: TP = true positive; FP = false positive; FN = false negative; TN = true negative; CI = confidence interval.

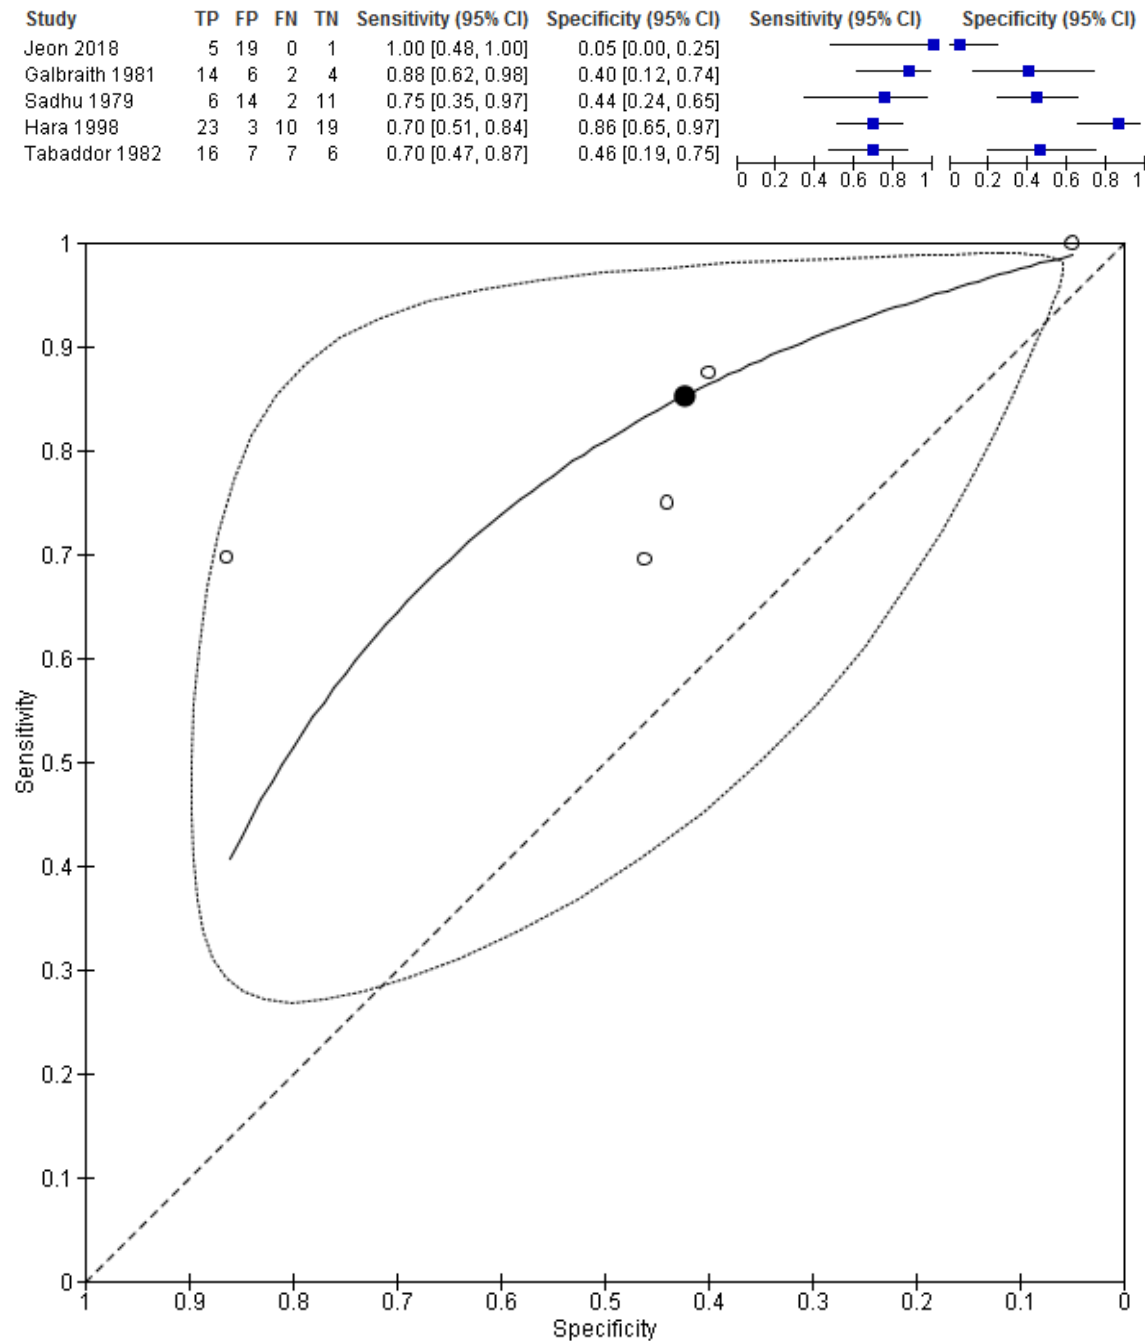

**Supplemental Figure 21:** Sensitivity Analysis for Midline Shift  $\geq 5$ mm after Removal of Studies with Potential High Risk-of-Bias. Forest plot of sensitivity and specificity, the hierarchical summary receiver operating characteristic curve and bivariate summary points of (specificity, sensitivity), and their 95% confidence region (dotted line) for midline shift  $\geq 5$ mm to detect elevated intracranial pressure. Abbreviations: TP = true positive; FP = false positive; FN = false negative; TN = true negative; CI = confidence interval.

| Study          | TP | FP | FN | TN | Sensitivity (95% CI) | Specificity (95% CI) | Sensitivity (95% CI) | Specificity (95% CI) |
|----------------|----|----|----|----|----------------------|----------------------|----------------------|----------------------|
| Jeon 2018      | 5  | 16 | 0  | 4  | 1.00 [0.48, 1.00]    | 0.20 [0.06, 0.44]    |                      |                      |
| Soustiel 2010  | 22 | 28 | 14 | 58 | 0.61 [0.43, 0.77]    | 0.67 [0.56, 0.77]    |                      |                      |
| Hara 1998      | 17 | 1  | 16 | 21 | 0.52 [0.34, 0.69]    | 0.95 [0.77, 1.00]    |                      |                      |
| Galbraith 1981 | 8  | 3  | 8  | 7  | 0.50 [0.25, 0.75]    | 0.70 [0.35, 0.93]    |                      |                      |
| Zoerle 2015    | 12 | 12 | 30 | 62 | 0.29 [0.16, 0.45]    | 0.84 [0.73, 0.91]    |                      |                      |
| Tabaddor 1982  | 6  | 3  | 17 | 10 | 0.26 [0.10, 0.48]    | 0.77 [0.46, 0.95]    |                      |                      |

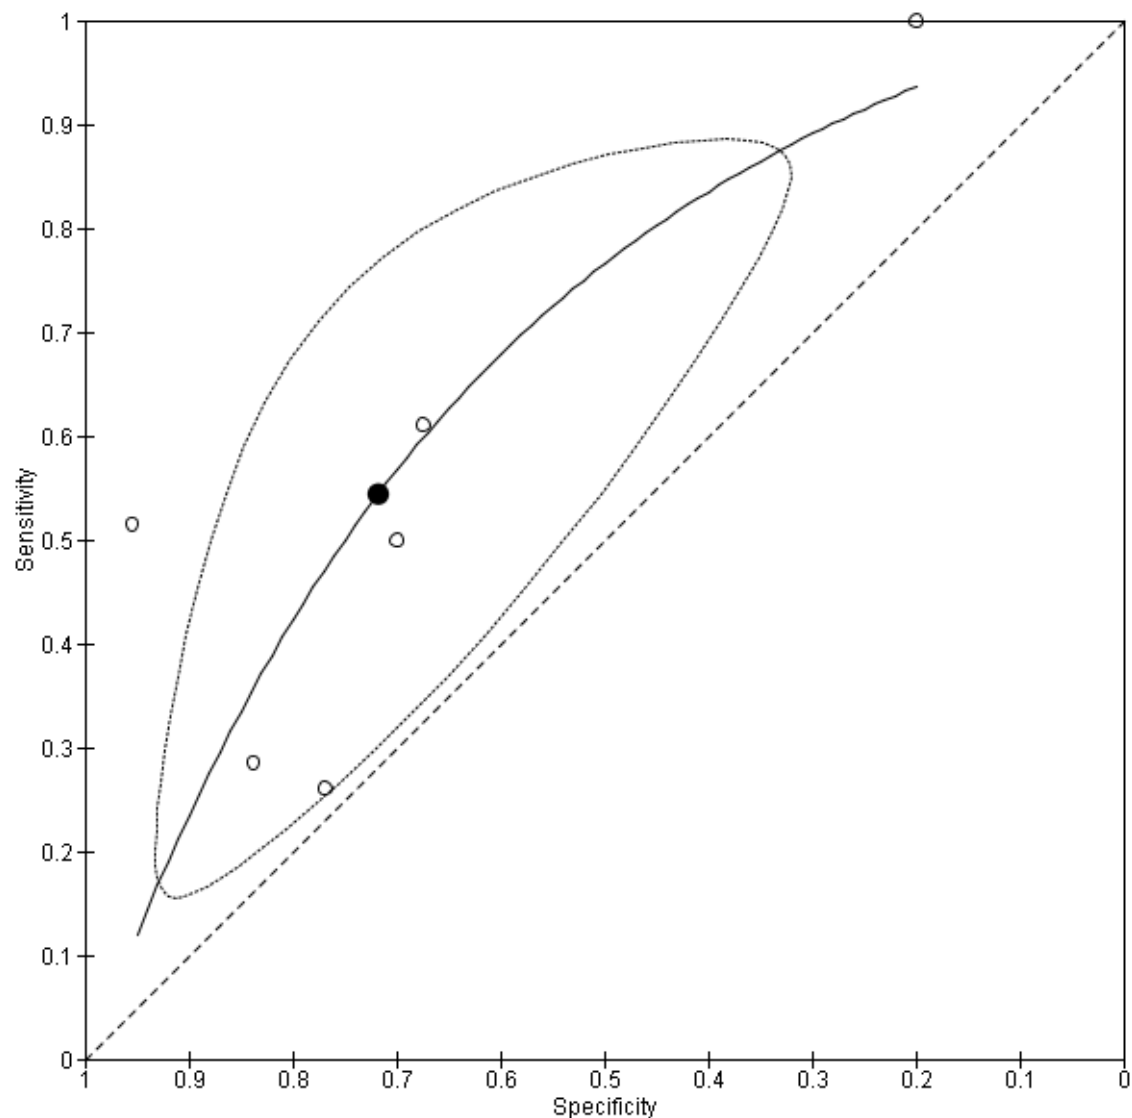

**Supplemental Figure 22:** Sensitivity Analysis for Midline Shift  $\geq 10\text{mm}$  after Removal of Studies with Potential High Risk-of-Bias. Forest plot of sensitivity and specificity, the hierarchical summary receiver operating characteristic curve and bivariate summary points of (specificity, sensitivity), and their 95% confidence region (dotted line) for midline shift  $\geq 10\text{mm}$  to detect elevated intracranial pressure. Abbreviations: TP = true positive; FP = false positive; FN = false negative; TN = true negative; CI = confidence interval.

| Study          | TP | FP | FN | TN | Sensitivity (95% CI) | Specificity (95% CI) | Sensitivity (95% CI) | Specificity (95% CI) |
|----------------|----|----|----|----|----------------------|----------------------|----------------------|----------------------|
| Jeon 2018      | 4  | 3  | 1  | 17 | 0.80 [0.28, 0.99]    | 0.85 [0.62, 0.97]    |                      |                      |
| Kamel 2012     | 13 | 4  | 27 | 13 | 0.33 [0.19, 0.49]    | 0.76 [0.50, 0.93]    |                      |                      |
| Hara 1998      | 9  | 0  | 24 | 22 | 0.27 [0.13, 0.46]    | 1.00 [0.85, 1.00]    |                      |                      |
| Galbraith 1981 | 2  | 0  | 14 | 10 | 0.13 [0.02, 0.38]    | 1.00 [0.69, 1.00]    |                      |                      |
| Tabaddor 1982  | 2  | 1  | 21 | 12 | 0.09 [0.01, 0.28]    | 0.92 [0.64, 1.00]    |                      |                      |

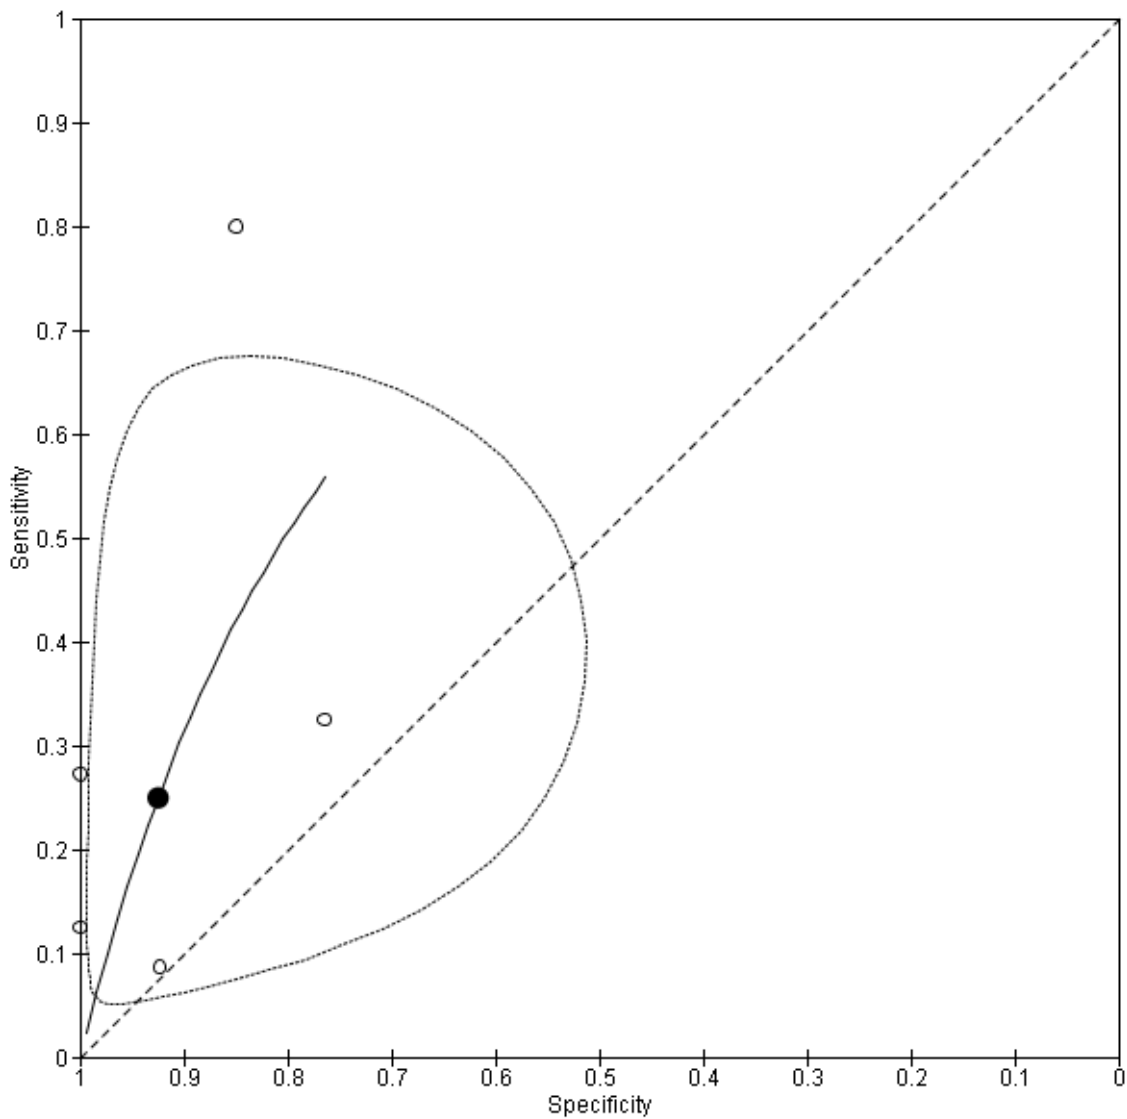

**Supplemental Table 16:** Pre- and Post-test Probability of Elevated ICP – Physical Examination. The post-test probabilities based upon presence or absence of physical examination signs (with sensitivity and specificity fixed at their summary estimates) given clinician-determined pre-test probability are displayed.

| Pre-test probability<br>(clinical suspicion prior<br>to test) | Post-test probability if |       |                 |             |                        |             |
|---------------------------------------------------------------|--------------------------|-------|-----------------|-------------|------------------------|-------------|
|                                                               | Glasgow Comma Scale      |       | Motor Posturing |             | Any Pupillary Dilation |             |
|                                                               | $\leq 8$                 | $> 8$ | Present         | Not present | Present                | Not present |
| 0.10                                                          | 0.123                    | 0.063 | 0.142           | 0.074       | 0.182                  | 0.085       |
| 0.25                                                          | 0.296                    | 0.168 | 0.332           | 0.193       | 0.400                  | 0.218       |
| 0.50                                                          | 0.558                    | 0.378 | 0.599           | 0.418       | 0.666                  | 0.455       |
| 0.75                                                          | 0.791                    | 0.646 | 0.817           | 0.683       | 0.857                  | 0.715       |
| 0.90                                                          | 0.919                    | 0.845 | 0.931           | 0.866       | 0.947                  | 0.883       |

**Supplemental Table 17:** Pre- and Post-test Probability of Elevated ICP – Computed Tomography. The post-test probabilities based upon presence or absence of computed tomography signs (with sensitivity and specificity fixed at their summary estimates) given clinician-determined pre-test probability are displayed.

| Pre-test probability (clinical suspicion prior to test) | Post-test probability if |         |                |       |       |       |       |       |                    |       |       |       |       |       |
|---------------------------------------------------------|--------------------------|---------|----------------|-------|-------|-------|-------|-------|--------------------|-------|-------|-------|-------|-------|
|                                                         | Basal Cisterns           |         | Marshall Score |       |       |       |       |       | Midline Shift (mm) |       |       |       |       |       |
|                                                         | Absent                   | Present | >= 3           | < 3   | >= 4  | < 4   | >= 5  | < 5   | > 0                | = 0   | > 5   | <= 5  | > 10  | <= 10 |
| 0.10                                                    | 0.197                    | 0.025   | 0.183          | 0.035 | 0.207 | 0.062 | 0.233 | 0.068 | 0.136              | 0.047 | 0.155 | 0.074 | 0.176 | 0.090 |
| 0.25                                                    | 0.423                    | 0.071   | 0.401          | 0.097 | 0.439 | 0.166 | 0.476 | 0.180 | 0.320              | 0.129 | 0.355 | 0.194 | 0.391 | 0.229 |
| 0.50                                                    | 0.688                    | 0.187   | 0.668          | 0.244 | 0.701 | 0.373 | 0.732 | 0.397 | 0.585              | 0.309 | 0.622 | 0.419 | 0.658 | 0.471 |
| 0.75                                                    | 0.869                    | 0.409   | 0.858          | 0.492 | 0.875 | 0.641 | 0.891 | 0.664 | 0.809              | 0.572 | 0.832 | 0.684 | 0.852 | 0.727 |
| 0.90                                                    | 0.952                    | 0.675   | 0.948          | 0.744 | 0.955 | 0.843 | 0.961 | 0.855 | 0.927              | 0.801 | 0.937 | 0.867 | 0.945 | 0.889 |
